# Supplementary material for: Competitive tuning: Competition's role in setting the frequency-dependence of Ca2+-dependent proteins
Source: PubMed Central journal article supplement (PMC5690689; doi:10.1371/journal.pcbi.1005820), 2017-11-06
Supplement: pcbi.1005820.s001.pdf [file pcbi.1005820.s001.pdf]

| Parameter                       | Description                                                               | Value Range                                | Value Used                              | Reference(s) |
|---------------------------------|---------------------------------------------------------------------------|--------------------------------------------|-----------------------------------------|--------------|
| Ca <sup>2+</sup> binding to CaM |                                                                           |                                            |                                         |              |
| $k_{on}^{1N}$                   | 1 <sup>st</sup> Ca <sup>2+</sup> binding to CaM N-terminus                | 25.0-260.0 $\mu\text{M}^{-1}\text{s}^{-1}$ | 100.0 $\mu\text{M}^{-1}\text{s}^{-1}$   | [1]          |
| $k_{off}^{1N}$                  | 1 <sup>st</sup> Ca <sup>2+</sup> dissociation from CaM N-terminus         | 1000.0-4000.0 $\text{s}^{-1}$              | 2500.0 $\text{s}^{-1}$                  | [1]          |
| $K_D^{1N}$                      | Equilibrium binding of 1 <sup>st</sup> Ca <sup>2+</sup> to CaM N-terminus | 15.0-40.0 $\mu\text{M}$                    | 25.0 $\mu\text{M}$                      | [1]          |
| $k_{on}^{2N}$                   | 2 <sup>nd</sup> Ca <sup>2+</sup> binding to CaM N-terminus                | 50.0-300.0 $\mu\text{M}^{-1}\text{s}^{-1}$ | 150.0 $\mu\text{M}^{-1}\text{s}^{-1}$   | [1]          |
| $k_{off}^{2N}$                  | 2 <sup>nd</sup> Ca <sup>2+</sup> dissociation from CaM N-terminus         | 500.0-1000.0+ $\text{s}^{-1}$              | 750.0 $\text{s}^{-1}$                   | [1]          |
| $K_D^{2N}$                      | Equilibrium binding of 2 <sup>nd</sup> Ca <sup>2+</sup> to CaM N-terminus | 3.3-9.0 $\mu\text{M}$                      | 5.0 $\mu\text{M}$                       | [1]          |
| $k_{on}^{1C}$                   | 1 <sup>st</sup> Ca <sup>2+</sup> binding to CaM C-terminus                | 1.2-9.6 $\mu\text{M}^{-1}\text{s}^{-1}$    | 4.0 $\mu\text{M}^{-1}\text{s}^{-1}$     | [1]          |
| $k_{off}^{1C}$                  | 1 <sup>st</sup> Ca <sup>2+</sup> dissociation from CaM C-terminus         | 10.0-70.0 $\text{s}^{-1}$                  | 40.0 $\text{s}^{-1}$                    | [1]          |
| $K_D^{1C}$                      | Equilibrium binding of 1 <sup>st</sup> Ca <sup>2+</sup> to CaM C-terminus | 7.3-12.0 $\mu\text{M}$                     | 10.0 $\mu\text{M}$                      | [1]          |
| $k_{on}^{2C}$                   | 2 <sup>nd</sup> Ca <sup>2+</sup> binding to CaM C-terminus                | 5.0-25.0 $\mu\text{M}^{-1}\text{s}^{-1}$   | 10.0 $\mu\text{M}^{-1}\text{s}^{-1}$    | [1]          |
| $k_{off}^{2C}$                  | 2 <sup>nd</sup> Ca <sup>2+</sup> dissociation from CaM C-terminus         | 8.5-10.0 $\text{s}^{-1}$                   | 9.25 $\text{s}^{-1}$                    | [1]          |
| $K_D^{2C}$                      | Equilibrium binding of 2 <sup>nd</sup> Ca <sup>2+</sup> to CaM C-terminus | 0.4-1.7 $\mu\text{M}$                      | 0.925 $\mu\text{M}$                     | [1]          |
| CaM binding to AC1              |                                                                           |                                            |                                         |              |
| $k_{on}^{AC1CaM0}$              | CaM0 binding to AC1                                                       |                                            | 0.00166 $\mu\text{M}^{-1}\text{s}^{-1}$ | [2]          |
| $k_{off}^{AC1CaM0}$             | CaM0 dissociation from AC1                                                |                                            | 0.9 $\text{s}^{-1}$                     | [3]          |
| $K_D^{AC1CaM0}$                 | Equilibrium binding of CaM0 to AC1                                        |                                            | 542.0 $\mu\text{M}$                     | [4]          |
| $k_{on}^{AC1CaM1N}$             | CaM1N binding to AC1                                                      |                                            | 0.00166 $\mu\text{M}^{-1}\text{s}^{-1}$ | [2]          |
| $k_{off}^{AC1CaM1N}$            | CaM1N dissociation from AC1                                               |                                            | 0.9 $\text{s}^{-1}$                     | [3]          |
| $K_D^{AC1CaM1N}$                | Equilibrium binding of CaM1N to AC1                                       |                                            | 542.0 $\mu\text{M}$                     | [4]          |
| $k_{on}^{AC1CaM1C}$             | CaM1C binding to AC1                                                      |                                            | 0.00830 $\mu\text{M}^{-1}\text{s}^{-1}$ | [2]          |
| $k_{off}^{AC1CaM1C}$            | CaM1C dissociation from AC1                                               |                                            | 0.9 $\text{s}^{-1}$                     | [3]          |
| $K_D^{AC1CaM1C}$                | Equilibrium binding of CaM1C to AC1                                       |                                            | 108.0 $\mu\text{M}$                     | [4]          |
| $k_{on}^{AC1CaM1N1C}$           | CaM1N1C binding to AC1                                                    |                                            | 0.00830 $\mu\text{M}^{-1}\text{s}^{-1}$ | [2]          |
| $k_{off}^{AC1CaM1N1C}$          | CaM1N1C dissociation from AC1                                             |                                            | 0.9 $\text{s}^{-1}$                     | [3]          |
| $K_D^{AC1CaM1N1C}$              | Equilibrium binding of CaM1N1C to AC1                                     |                                            | 108.0 $\mu\text{M}$                     | [4]          |
| $k_{on}^{AC1CaM2N}$             | CaM2N binding to AC1                                                      |                                            | 0.156 $\mu\text{M}^{-1}\text{s}^{-1}$   | [2]          |
| $k_{off}^{AC1CaM2N}$            | CaM2N dissociation from AC1                                               |                                            | 0.9 $\text{s}^{-1}$                     | [3]          |
| $K_D^{AC1CaM2N}$                | Equilibrium binding of CaM2N to AC1                                       |                                            | 5.78 $\mu\text{M}$                      | [4]          |
| $k_{on}^{AC1CaM2C}$             | CaM2C binding to AC1                                                      |                                            | 0.064 $\mu\text{M}^{-1}\text{s}^{-1}$   | [2]          |
| $k_{off}^{AC1CaM2C}$            | CaM2C dissociation from AC1                                               |                                            | 0.9 $\text{s}^{-1}$                     | [3]          |
| $K_D^{AC1CaM2C}$                | Equilibrium binding of CaM2C to AC1                                       |                                            | 14.1 $\mu\text{M}$                      | [4]          |
| $k_{on}^{AC1CaM2N1C}$           | CaM2N1C binding to AC1                                                    |                                            | 0.778 $\mu\text{M}^{-1}\text{s}^{-1}$   | [2]          |
| $k_{off}^{AC1CaM2N1C}$          | CaM2N1C dissociation from AC1                                             |                                            | 0.9 $\text{s}^{-1}$                     | [3]          |
| $K_D^{AC1CaM2N1C}$              | Equilibrium binding of CaM2N1C to AC1                                     |                                            | 1.16 $\mu\text{M}$                      | [4]          |
| $k_{on}^{AC1CaM1N2C}$           | CaM1N2C binding to AC1                                                    |                                            | 0.064 $\mu\text{M}^{-1}\text{s}^{-1}$   | [2]          |

|                                     |                                                                               |  |                                          |     |
|-------------------------------------|-------------------------------------------------------------------------------|--|------------------------------------------|-----|
| $k_{off}^{AC1CaM1N2C}$              | CaM1N2C dissociation from AC1                                                 |  | 0.9 s <sup>-1</sup>                      | [3] |
| $K_D^{AC1CaM1N2C}$                  | Equilibrium binding of CaM1N2C to AC1                                         |  | 14.1 μM                                  | [4] |
| $k_{on}^{AC1CaM4}$                  | CaM4 binding to AC1                                                           |  | 6.0 μM <sup>-1</sup> s <sup>-1</sup>     | [5] |
| $k_{off}^{AC1CaM4}$                 | CaM4 dissociation from AC1                                                    |  | 0.9 s <sup>-1</sup>                      | [5] |
| $K_D^{AC1CaM4}$                     | Equilibrium binding of CaM4 to AC1                                            |  | 0.15 μM                                  | [2] |
| Ca <sup>2+</sup> binding to AC1-CaM |                                                                               |  |                                          |     |
| $k_{on}^{AC11N}$                    | 1 <sup>st</sup> Ca <sup>2+</sup> binding to AC1-CaM N-terminus                |  | 100.0 μM <sup>-1</sup> s <sup>-1</sup>   | [6] |
| $k_{off}^{AC11N}$                   | 1 <sup>st</sup> Ca <sup>2+</sup> dissociation from AC1-CaM N-terminus         |  | 2500.0 s <sup>-1</sup>                   | [8] |
| $K_D^{AC11N}$                       | Equilibrium binding of 1 <sup>st</sup> Ca <sup>2+</sup> to AC1-CaM N-terminus |  | 25.0 μM                                  | [2] |
| $k_{on}^{AC12N}$                    | 2 <sup>nd</sup> Ca <sup>2+</sup> binding to AC1-CaM N-terminus                |  | 150.0 μM <sup>-1</sup> s <sup>-1</sup>   | [6] |
| $k_{off}^{AC12N}$                   | 2 <sup>nd</sup> Ca <sup>2+</sup> dissociation from AC1-CaM N-terminus         |  | 8.0 s <sup>-1</sup>                      | [8] |
| $K_D^{AC12N}$                       | Equilibrium binding of 2 <sup>nd</sup> Ca <sup>2+</sup> to AC1-CaM N-terminus |  | 0.0533 μM                                | [2] |
| $k_{on}^{AC11C}$                    | 1 <sup>st</sup> Ca <sup>2+</sup> binding to AC1-CaM C-terminus                |  | 4.0 μM <sup>-1</sup> s <sup>-1</sup>     | [6] |
| $k_{off}^{AC11C}$                   | 1 <sup>st</sup> Ca <sup>2+</sup> dissociation from AC1-CaM C-terminus         |  | 8.0 s <sup>-1</sup>                      | [8] |
| $K_D^{AC11C}$                       | Equilibrium binding of 1 <sup>st</sup> Ca <sup>2+</sup> to AC1-CaM C-terminus |  | 2.0 μM                                   | [2] |
| $k_{on}^{AC12C}$                    | 2 <sup>nd</sup> Ca <sup>2+</sup> binding to AC1-CaM C-terminus                |  | 10.0 μM <sup>-1</sup> s <sup>-1</sup>    | [6] |
| $k_{off}^{AC12C}$                   | 2 <sup>nd</sup> Ca <sup>2+</sup> dissociation from AC1-CaM C-terminus         |  | 1.2 s <sup>-1</sup>                      | [8] |
| $K_D^{AC12C}$                       | Equilibrium binding of 2 <sup>nd</sup> Ca <sup>2+</sup> to AC1-CaM C-terminus |  | 0.12 μM                                  | [2] |
| CaM binding to AC8 N-terminus       |                                                                               |  |                                          |     |
| $k_{on}^{AC8ntCaM0}$                | CaM0 binding to AC8 N-terminus                                                |  | 0.00828 μM <sup>-1</sup> s <sup>-1</sup> | [2] |
| $k_{off}^{AC8ntCaM0}$               | CaM0 dissociation from AC8 N-terminus                                         |  | 1.0 s <sup>-1</sup>                      | [3] |
| $K_D^{AC8ntCaM0}$                   | Equilibrium binding of CaM0 to AC8 N-terminus                                 |  | 121.0 μM                                 | [4] |
| $k_{on}^{AC8ntCaM1N}$               | CaM1N binding to AC8 N-terminus                                               |  | 0.00828 μM <sup>-1</sup> s <sup>-1</sup> | [2] |
| $k_{off}^{AC8ntCaM1N}$              | CaM1N dissociation from AC8 N-terminus                                        |  | 1.0 s <sup>-1</sup>                      | [3] |
| $K_D^{AC8ntCaM1N}$                  | Equilibrium binding of CaM1N to AC8 N-terminus                                |  | 121.0 μM                                 | [4] |
| $k_{on}^{AC8ntCaM1C}$               | CaM1C binding to AC8 N-terminus                                               |  | 0.0676 μM <sup>-1</sup> s <sup>-1</sup>  | [2] |
| $k_{off}^{AC8ntCaM1C}$              | CaM1C dissociation from AC8 N-terminus                                        |  | 1.0 s <sup>-1</sup>                      | [3] |
| $K_D^{AC8ntCaM1C}$                  | Equilibrium binding of CaM1C to AC8 N-terminus                                |  | 14.8 μM                                  | [4] |
| $k_{on}^{AC8ntCaM1N1C}$             | CaM1N1C binding to AC8 N-terminus                                             |  | 0.0676 μM <sup>-1</sup> s <sup>-1</sup>  | [2] |
| $k_{off}^{AC8ntCaM1N1C}$            | CaM1N1C dissociation from AC8 N-terminus                                      |  | 1.0 s <sup>-1</sup>                      | [3] |
| $K_D^{AC8ntCaM1N1C}$                | Equilibrium binding of CaM1N1C to AC8 N-terminus                              |  | 14.8 μM                                  | [4] |

|                                                 |                                                                                           |  |                                         |     |
|-------------------------------------------------|-------------------------------------------------------------------------------------------|--|-----------------------------------------|-----|
| $k_{on}^{AC8ntCaM2N}$                           | CaM2N binding to AC8 N-terminus                                                           |  | $0.00828 \mu\text{M}^{-1}\text{s}^{-1}$ | [2] |
| $k_{off}^{AC8ntCaM2N}$                          | CaM2N dissociation from AC8 N-terminus                                                    |  | $1.0 \text{ s}^{-1}$                    | [3] |
| $K_D^{AC8ntCaM2N}$                              | Equilibrium binding of CaM2N to AC8 N-terminus                                            |  | $121.0 \mu\text{M}$                     | [4] |
| $k_{on}^{AC8ntCaM2C}$                           | CaM2C binding to AC8 N-terminus                                                           |  | $1.25 \mu\text{M}^{-1}\text{s}^{-1}$    | [2] |
| $k_{off}^{AC8ntCaM2C}$                          | CaM2C dissociation from AC8 N-terminus                                                    |  | $1.0 \text{ s}^{-1}$                    | [3] |
| $K_D^{AC8ntCaM2C}$                              | Equilibrium binding of CaM2C to AC8 N-terminus                                            |  | $0.8 \mu\text{M}$                       | [4] |
| $k_{on}^{AC8ntCaM2N1C}$                         | CaM2N1C binding to AC8 N-terminus                                                         |  | $0.0676 \mu\text{M}^{-1}\text{s}^{-1}$  | [2] |
| $k_{off}^{AC8ntCaM2N1C}$                        | CaM2N1C dissociation from AC8 N-terminus                                                  |  | $1.0 \text{ s}^{-1}$                    | [3] |
| $K_D^{AC8ntCaM2N1C}$                            | Equilibrium binding of CaM2N1C to AC8 N-terminus                                          |  | $14.8 \mu\text{M}$                      | [4] |
| $k_{on}^{AC8ntCaM1N2C}$                         | CaM1N2C binding to AC8 N-terminus                                                         |  | $1.25 \mu\text{M}^{-1}\text{s}^{-1}$    | [2] |
| $k_{off}^{AC8ntCaM1N2C}$                        | CaM1N2C dissociation from AC8 N-terminus                                                  |  | $1.0 \text{ s}^{-1}$                    | [3] |
| $K_D^{AC8ntCaM1N2C}$                            | Equilibrium binding of CaM1N2C to AC8 N-terminus                                          |  | $0.8 \mu\text{M}$                       | [4] |
| $k_{on}^{AC8ntCaM4}$                            | CaM4 binding to AC8 N-terminus                                                            |  | $1.25 \mu\text{M}^{-1}\text{s}^{-1}$    | [5] |
| $k_{off}^{AC8ntCaM4}$                           | CaM4 dissociation from AC8 N-terminus                                                     |  | $1.0 \text{ s}^{-1}$                    | [5] |
| $K_D^{AC8ntCaM4}$                               | Equilibrium binding of CaM4 to AC8 N-terminus                                             |  | $0.8 \mu\text{M}$                       | [2] |
| Ca <sup>2+</sup> binding to AC8(N-terminus)-CaM |                                                                                           |  |                                         |     |
| $k_{on}^{AC8nt1N}$                              | 1 <sup>st</sup> Ca <sup>2+</sup> binding to AC8(N-terminus)-CaM N-terminus                |  | $100.0 \mu\text{M}^{-1}\text{s}^{-1}$   | [6] |
| $k_{off}^{AC8nt1N}$                             | 1 <sup>st</sup> Ca <sup>2+</sup> dissociation from AC8(N-terminus)-CaM N-terminus         |  | $2500.0 \text{ s}^{-1}$                 | [7] |
| $K_D^{AC8nt1N}$                                 | Equilibrium binding of 1 <sup>st</sup> Ca <sup>2+</sup> to AC8(N-terminus)-CaM N-terminus |  | $25.0 \mu\text{M}$                      | [2] |
| $k_{on}^{AC8nt2N}$                              | 2 <sup>nd</sup> Ca <sup>2+</sup> binding to AC8(N-terminus)-CaM N-terminus                |  | $150.0 \mu\text{M}^{-1}\text{s}^{-1}$   | [6] |
| $k_{off}^{AC8nt2N}$                             | 2 <sup>nd</sup> Ca <sup>2+</sup> dissociation from AC8(N-terminus)-CaM N-terminus         |  | $750.0 \text{ s}^{-1}$                  | [8] |
| $K_D^{AC8nt2N}$                                 | Equilibrium binding of 2 <sup>nd</sup> Ca <sup>2+</sup> to AC8(N-terminus)-CaM N-terminus |  | $5.0 \mu\text{M}$                       | [2] |
| $k_{on}^{AC8nt1C}$                              | 1 <sup>st</sup> Ca <sup>2+</sup> binding to AC8(N-terminus)-CaM C-terminus                |  | $4.0 \mu\text{M}^{-1}\text{s}^{-1}$     | [6] |
| $k_{off}^{AC8nt1C}$                             | 1 <sup>st</sup> Ca <sup>2+</sup> dissociation from AC8(N-terminus)-CaM C-terminus         |  | $4.9 \text{ s}^{-1}$                    | [8] |
| $K_D^{AC8nt1C}$                                 | Equilibrium binding of 1 <sup>st</sup> Ca <sup>2+</sup> to AC8(N-terminus)-CaM C-terminus |  | $1.23 \mu\text{M}$                      | [2] |
| $k_{on}^{AC8nt2C}$                              | 2 <sup>nd</sup> Ca <sup>2+</sup> binding to AC8(N-terminus)-CaM C-terminus                |  | $10.0 \mu\text{M}^{-1}\text{s}^{-1}$    | [6] |
| $k_{off}^{AC8nt2C}$                             | 2 <sup>nd</sup> Ca <sup>2+</sup> dissociation from AC8(N-terminus)-CaM C-terminus         |  | $0.5 \text{ s}^{-1}$                    | [8] |

|                                                 |                                                                                           |  |                                         |     |
|-------------------------------------------------|-------------------------------------------------------------------------------------------|--|-----------------------------------------|-----|
| $K_D^{AC8nt2C}$                                 | Equilibrium binding of 2 <sup>nd</sup> Ca <sup>2+</sup> to AC8(N-terminus)-CaM C-terminus |  | 0.05 $\mu\text{M}$                      | [2] |
| CaM binding to AC8 C-terminus                   |                                                                                           |  |                                         |     |
| $k_{on}^{AC8ctCaM0}$                            | CaM0 binding to AC8 C-terminus                                                            |  | 0.00267 $\mu\text{M}^{-1}\text{s}^{-1}$ | [2] |
| $k_{off}^{AC8ctCaM0}$                           | CaM0 dissociation from AC8 C-terminus                                                     |  | 1.0 $\text{s}^{-1}$                     | [3] |
| $K_D^{AC8ctCaM0}$                               | Equilibrium binding of CaM0 to AC8 C-terminus                                             |  | 375.0 $\mu\text{M}$                     | [4] |
| $k_{on}^{AC8ctCaM1N}$                           | CaM1N binding to AC8 C-terminus                                                           |  | 0.00267 $\mu\text{M}^{-1}\text{s}^{-1}$ | [2] |
| $k_{off}^{AC8ctCaM1N}$                          | CaM1N dissociation from AC8 C-terminus                                                    |  | 1.0 $\text{s}^{-1}$                     | [3] |
| $K_D^{AC8ctCaM1N}$                              | Equilibrium binding of CaM1N to AC8 C-terminus                                            |  | 375.0 $\mu\text{M}$                     | [4] |
| $k_{on}^{AC8ctCaM1C}$                           | CaM1C binding to AC8 C-terminus                                                           |  | 0.00267 $\mu\text{M}^{-1}\text{s}^{-1}$ | [2] |
| $k_{off}^{AC8ctCaM1C}$                          | CaM1C dissociation from AC8 C-terminus                                                    |  | 1.0 $\text{s}^{-1}$                     | [3] |
| $K_D^{AC8ctCaM1C}$                              | Equilibrium binding of CaM1C to AC8 C-terminus                                            |  | 375.0 $\mu\text{M}$                     | [4] |
| $k_{on}^{AC8ctCaM1N1C}$                         | CaM1N1C binding to AC8 C-terminus                                                         |  | 0.00267 $\mu\text{M}^{-1}\text{s}^{-1}$ | [2] |
| $k_{off}^{AC8ctCaM1N1C}$                        | CaM1N1C dissociation from AC8 C-terminus                                                  |  | 1.0 $\text{s}^{-1}$                     | [3] |
| $K_D^{AC8ctCaM1N1C}$                            | Equilibrium binding of CaM1N1C to AC8 C-terminus                                          |  | 375.0 $\mu\text{M}$                     | [4] |
| $k_{on}^{AC8ctCaM2N}$                           | CaM2N binding to AC8 C-terminus                                                           |  | 1.25 $\mu\text{M}^{-1}\text{s}^{-1}$    | [2] |
| $k_{off}^{AC8ctCaM2N}$                          | CaM2N dissociation from AC8 C-terminus                                                    |  | 1.0 $\text{s}^{-1}$                     | [3] |
| $K_D^{AC8ctCaM2N}$                              | Equilibrium binding of CaM2N to AC8 C-terminus                                            |  | 0.8 $\mu\text{M}$                       | [4] |
| $k_{on}^{AC8ctCaM2C}$                           | CaM2C binding to AC8 C-terminus                                                           |  | 0.00267 $\mu\text{M}^{-1}\text{s}^{-1}$ | [2] |
| $k_{off}^{AC8ctCaM2C}$                          | CaM2C dissociation from AC8 C-terminus                                                    |  | 1.0 $\text{s}^{-1}$                     | [3] |
| $K_D^{AC8ctCaM2C}$                              | Equilibrium binding of CaM2C to AC8 C-terminus                                            |  | 375.0 $\mu\text{M}$                     | [4] |
| $k_{on}^{AC8ctCaM2N1C}$                         | CaM2N1C binding to AC8 C-terminus                                                         |  | 1.25 $\mu\text{M}^{-1}\text{s}^{-1}$    | [2] |
| $k_{off}^{AC8ctCaM2N1C}$                        | CaM2N1C dissociation from AC8 C-terminus                                                  |  | 1.0 $\text{s}^{-1}$                     | [3] |
| $K_D^{AC8ctCaM2N1C}$                            | Equilibrium binding of CaM2N1C to AC8 C-terminus                                          |  | 0.8 $\mu\text{M}$                       | [4] |
| $k_{on}^{AC8ctCaM1N2C}$                         | CaM1N2C binding to AC8 C-terminus                                                         |  | 0.00267 $\mu\text{M}^{-1}\text{s}^{-1}$ | [2] |
| $k_{off}^{AC8ctCaM1N2C}$                        | CaM1N2C dissociation from AC8 C-terminus                                                  |  | 1.0 $\text{s}^{-1}$                     | [3] |
| $K_D^{AC8ctCaM1N2C}$                            | Equilibrium binding of CaM1N2C to AC8 C-terminus                                          |  | 375.0 $\mu\text{M}$                     | [4] |
| $k_{on}^{AC8ctCaM4}$                            | CaM4 binding to AC8 C-terminus                                                            |  | 1.25 $\mu\text{M}^{-1}\text{s}^{-1}$    | [5] |
| $k_{off}^{AC8ctCaM4}$                           | CaM4 dissociation from AC8 C-terminus                                                     |  | 1.0 $\text{s}^{-1}$                     | [5] |
| $K_D^{AC8ctCaM4}$                               | Equilibrium binding of CaM4 to AC8 C-terminus                                             |  | 0.8 $\mu\text{M}$                       | [2] |
| Ca <sup>2+</sup> binding to AC8(C-terminus)-CaM |                                                                                           |  |                                         |     |
| $k_{on}^{AC8ct1N}$                              | 1 <sup>st</sup> Ca <sup>2+</sup> binding to AC8(C-terminus)-CaM N-terminus                |  | 100.0 $\mu\text{M}^{-1}\text{s}^{-1}$   | [6] |

|                       |                                                                                           |  |                                               |     |
|-----------------------|-------------------------------------------------------------------------------------------|--|-----------------------------------------------|-----|
| $k_{off}^{AC8ct1N}$   | 1 <sup>st</sup> Ca <sup>2+</sup> dissociation from AC8(C-terminus)-CaM N-terminus         |  | 2500.0 s <sup>-1</sup>                        | [7] |
| $K_D^{AC8ct1N}$       | Equilibrium binding of 1 <sup>st</sup> Ca <sup>2+</sup> to AC8(C-terminus)-CaM N-terminus |  | 25.0 μM                                       | [2] |
| $k_{on}^{AC8ct2N}$    | 2 <sup>nd</sup> Ca <sup>2+</sup> binding to AC8(C-terminus)-CaM N-terminus                |  | 150.0 μM <sup>-1</sup> s <sup>-1</sup>        | [6] |
| $k_{off}^{AC8ct2N}$   | 2 <sup>nd</sup> Ca <sup>2+</sup> dissociation from AC8(C-terminus)-CaM N-terminus         |  | 1.6 s <sup>-1</sup>                           | [8] |
| $K_D^{AC8ct2N}$       | Equilibrium binding of 2 <sup>nd</sup> Ca <sup>2+</sup> to AC8(C-terminus)-CaM N-terminus |  | 0.0107 μM                                     | [2] |
| $k_{on}^{AC8ct1C}$    | 1 <sup>st</sup> Ca <sup>2+</sup> binding to AC8(C-terminus)-CaM C-terminus                |  | 4.0 μM <sup>-1</sup> s <sup>-1</sup>          | [6] |
| $k_{off}^{AC8ct1C}$   | 1 <sup>st</sup> Ca <sup>2+</sup> dissociation from AC8(C-terminus)-CaM C-terminus         |  | 40.0 s <sup>-1</sup>                          | [8] |
| $K_D^{AC8ct1C}$       | Equilibrium binding of 1 <sup>st</sup> Ca <sup>2+</sup> to AC8(C-terminus)-CaM C-terminus |  | 10.0 μM                                       | [2] |
| $k_{on}^{AC8ct2C}$    | 2 <sup>nd</sup> Ca <sup>2+</sup> binding to AC8(C-terminus)-CaM C-terminus                |  | 10.0 μM <sup>-1</sup> s <sup>-1</sup>         | [6] |
| $k_{off}^{AC8ct2C}$   | 2 <sup>nd</sup> Ca <sup>2+</sup> dissociation from AC8(C-terminus)-CaM C-terminus         |  | 9.25 s <sup>-1</sup>                          | [8] |
| $K_D^{AC8ct2C}$       | Equilibrium binding of 2 <sup>nd</sup> Ca <sup>2+</sup> to AC8(C-terminus)-CaM C-terminus |  | 0.925 μM                                      | [2] |
| CaM binding to CaN    |                                                                                           |  |                                               |     |
| $k_{on}^{PPCaM0}$     | CaM0 binding to CaN                                                                       |  | 0.0000000798 μM <sup>-1</sup> s <sup>-1</sup> | [2] |
| $k_{off}^{PPCaM0}$    | CaM0 dissociation from CaN                                                                |  | 0.000319 s <sup>-1</sup>                      | [3] |
| $K_D^{PPCaM0}$        | Equilibrium binding of CaM0 to CaN                                                        |  | 3999.0 μM                                     | [4] |
| $k_{on}^{PPCaM1N}$    | CaM1N binding to CaN                                                                      |  | 0.00000665 μM <sup>-1</sup> s <sup>-1</sup>   | [2] |
| $k_{off}^{PPCaM1N}$   | CaM1N dissociation from CaN                                                               |  | 0.000319 s <sup>-1</sup>                      | [3] |
| $K_D^{PPCaM1N}$       | Equilibrium binding of CaM1N to CaN                                                       |  | 48.0 μM                                       | [4] |
| $k_{on}^{PPCaM1C}$    | CaM1C binding to CaN                                                                      |  | 0.00001334 μM <sup>-1</sup> s <sup>-1</sup>   | [2] |
| $k_{off}^{PPCaM1C}$   | CaM1C dissociation from CaN                                                               |  | 0.000319 s <sup>-1</sup>                      | [3] |
| $K_D^{PPCaM1C}$       | Equilibrium binding of CaM1C to CaN                                                       |  | 23.9 μM                                       | [4] |
| $k_{on}^{PPCaM1N1C}$  | CaM1N1C binding to CaN                                                                    |  | 0.000665 μM <sup>-1</sup> s <sup>-1</sup>     | [2] |
| $k_{off}^{PPCaM1N1C}$ | CaM1N1C dissociation from CaN                                                             |  | 0.000319 s <sup>-1</sup>                      | [3] |
| $K_D^{PPCaM1N1C}$     | Equilibrium binding of CaM1N1C to CaN                                                     |  | 0.480 μM                                      | [4] |
| $k_{on}^{PPCaM2N}$    | CaM2N binding to CaN                                                                      |  | 0.000416 μM <sup>-1</sup> s <sup>-1</sup>     | [2] |
| $k_{off}^{PPCaM2N}$   | CaM2N dissociation from CaN                                                               |  | 0.000319 s <sup>-1</sup>                      | [3] |
| $K_D^{PPCaM2N}$       | Equilibrium binding of CaM2N to CaN                                                       |  | 0.768 μM                                      | [4] |
| $k_{on}^{PPCaM2C}$    | CaM2C binding to CaN                                                                      |  | 0.000123 μM <sup>-1</sup> s <sup>-1</sup>     | [2] |
| $k_{off}^{PPCaM2C}$   | CaM2C dissociation from CaN                                                               |  | 0.000319 s <sup>-1</sup>                      | [3] |
| $K_D^{PPCaM2C}$       | Equilibrium binding of CaM2C to CaN                                                       |  | 2.59 μM                                       | [4] |
| $k_{on}^{PPCaM2N1C}$  | CaM2N1C binding to CaN                                                                    |  | 0.0416 μM <sup>-1</sup> s <sup>-1</sup>       | [2] |
| $k_{off}^{PPCaM2N1C}$ | CaM2N1C dissociation from CaN                                                             |  | 0.000319 s <sup>-1</sup>                      | [3] |

|                                     |                                                                               |                                             |                                        |        |
|-------------------------------------|-------------------------------------------------------------------------------|---------------------------------------------|----------------------------------------|--------|
| $K_D^{PPCaM2N1C}$                   | Equilibrium binding of CaM2N1C to CaN                                         |                                             | 0.00768 $\mu\text{M}$                  | [4]    |
| $k_{on}^{PPCaM1N2C}$                | CaM1N2C binding to CaN                                                        |                                             | 0.0102 $\mu\text{M}^{-1}\text{s}^{-1}$ | [2]    |
| $k_{off}^{PPCaM1N2C}$               | CaM1N2C dissociation from CaN                                                 |                                             | 0.000319 $\text{s}^{-1}$               | [3]    |
| $K_D^{PPCaM1N2C}$                   | Equilibrium binding of CaM1N2C to CaN                                         |                                             | 0.0311 $\mu\text{M}$                   | [4]    |
| $k_{on}^{PPCaM4}$                   | CaM4 binding to CaN                                                           | 0.0089-46.0 $\mu\text{M}^{-1}\text{s}^{-1}$ | 0.64 $\mu\text{M}^{-1}\text{s}^{-1}$   | [9-11] |
| $k_{off}^{PPCaM4}$                  | CaM4 dissociation from CaN                                                    | 0.000085-0.0039 $\text{s}^{-1}$             | 0.000319 $\text{s}^{-1}$               | [9-11] |
| $K_D^{PPCaM4}$                      | Equilibrium binding of CaM4 to CaN                                            | 0.000028-0.024 $\mu\text{M}$                | 0.000498 $\mu\text{M}$                 | [9-11] |
| Ca <sup>2+</sup> binding to CaN-CaM |                                                                               |                                             |                                        |        |
| $k_{on}^{PP1N}$                     | 1 <sup>st</sup> Ca <sup>2+</sup> binding to CaN-CaM N-terminus                |                                             | 100.0 $\mu\text{M}^{-1}\text{s}^{-1}$  | [6]    |
| $k_{off}^{PP1N}$                    | 1 <sup>st</sup> Ca <sup>2+</sup> dissociation from CaN-CaM N-terminus         |                                             | 30.0 $\text{s}^{-1}$                   | [2]    |
| $K_D^{PP1N}$                        | Equilibrium binding of 1 <sup>st</sup> Ca <sup>2+</sup> to CaN-CaM N-terminus |                                             | 0.3 $\mu\text{M}$                      | [12]   |
| $k_{on}^{PP2N}$                     | 2 <sup>nd</sup> Ca <sup>2+</sup> binding to CaN-CaM N-terminus                |                                             | 150.0 $\mu\text{M}^{-1}\text{s}^{-1}$  | [6]    |
| $k_{off}^{PP2N}$                    | 2 <sup>nd</sup> Ca <sup>2+</sup> dissociation from CaN-CaM N-terminus         |                                             | 12.0 $\text{s}^{-1}$                   | [2]    |
| $K_D^{PP2N}$                        | Equilibrium binding of 2 <sup>nd</sup> Ca <sup>2+</sup> to CaN-CaM N-terminus |                                             | 0.08 $\mu\text{M}$                     | [12]   |
| $k_{on}^{PP1C}$                     | 1 <sup>st</sup> Ca <sup>2+</sup> binding to CaN-CaM C-terminus                |                                             | 4.0 $\mu\text{M}^{-1}\text{s}^{-1}$    | [6]    |
| $k_{off}^{PP1C}$                    | 1 <sup>st</sup> Ca <sup>2+</sup> dissociation from CaN-CaM C-terminus         |                                             | 0.4 $\text{s}^{-1}$                    | [2]    |
| $K_D^{PP1C}$                        | Equilibrium binding of 1 <sup>st</sup> Ca <sup>2+</sup> to CaN-CaM C-terminus |                                             | 0.1 $\mu\text{M}$                      | [12]   |
| $k_{on}^{PP2C}$                     | 2 <sup>nd</sup> Ca <sup>2+</sup> binding to CaN-CaM C-terminus                |                                             | 10.0 $\mu\text{M}^{-1}\text{s}^{-1}$   | [6]    |
| $k_{off}^{PP2C}$                    | 2 <sup>nd</sup> Ca <sup>2+</sup> dissociation from CaN-CaM C-terminus         |                                             | 0.6 $\text{s}^{-1}$                    | [2]    |
| $K_D^{PP2C}$                        | Equilibrium binding of 2 <sup>nd</sup> Ca <sup>2+</sup> to CaN-CaM C-terminus |                                             | 0.06 $\mu\text{M}$                     | [12]   |
| CaM binding to CaMKII               |                                                                               |                                             |                                        |        |
| $k_{on}^{KCaM0}$                    | CaM0 binding to CaMKII                                                        |                                             | 0.0038 $\mu\text{M}^{-1}\text{s}^{-1}$ | [1]    |
| $k_{off}^{KCaM0}$                   | CaM0 dissociation from CaMKII                                                 |                                             | 5.5 $\text{s}^{-1}$                    | [1]    |
| $K_D^{KCaM0}$                       | Equilibrium binding of CaM0 to CaMKII                                         |                                             | 1.45 $\text{mM}$                       | [2]    |
| $k_{on}^{KCaM1N}$                   | CaM1N binding to CaMKII                                                       |                                             | 0.022 $\mu\text{M}^{-1}\text{s}^{-1}$  | [1]    |
| $k_{off}^{KCaM1N}$                  | CaM1N dissociation from CaMKII                                                |                                             | 3.1 $\text{s}^{-1}$                    | [1]    |
| $K_D^{KCaM1N}$                      | Equilibrium binding of CaM1N to CaMKII                                        |                                             | 141.0 $\mu\text{M}$                    | [2]    |
| $k_{on}^{KCaM1C}$                   | CaM1C binding to CaMKII                                                       |                                             | 0.059 $\mu\text{M}^{-1}\text{s}^{-1}$  | [1]    |
| $k_{off}^{KCaM1C}$                  | CaM1C dissociation from CaMKII                                                |                                             | 6.1 $\text{s}^{-1}$                    | [1]    |
| $K_D^{KCaM1C}$                      | Equilibrium binding of CaM1C to CaMKII                                        |                                             | 103.0 $\mu\text{M}$                    | [2]    |
| $k_{on}^{KCaM1N1C}$                 | CaM1N1C binding to CaMKII                                                     |                                             | 0.33 $\mu\text{M}^{-1}\text{s}^{-1}$   | [1]    |
| $k_{off}^{KCaM1N1C}$                | CaM1N1C dissociation from CaMKII                                              |                                             | 3.4 $\text{s}^{-1}$                    | [1]    |
| $K_D^{KCaM1N1C}$                    | Equilibrium binding of CaM1N1C to CaMKII                                      |                                             | 10.3 $\mu\text{M}$                     | [2]    |
| $k_{on}^{KCaM2N}$                   | CaM2N binding to CaMKII                                                       |                                             | 0.12 $\mu\text{M}^{-1}\text{s}^{-1}$   | [1]    |

|                                        |                                                                                  |                                            |                                          |     |
|----------------------------------------|----------------------------------------------------------------------------------|--------------------------------------------|------------------------------------------|-----|
| $k_{off}^{KCaM2N}$                     | CaM2N dissociation from CaMKII                                                   |                                            | 1.7 s <sup>-1</sup>                      | [1] |
| $K_D^{KCaM2N}$                         | Equilibrium binding of CaM2N to CaMKII                                           | 16.5-23.5 μM                               | 14.2 μM                                  | [1] |
| $k_{on}^{KCaM2C}$                      | CaM2C binding to CaMKII                                                          |                                            | 0.92 μM <sup>-1</sup> s <sup>-1</sup>    | [1] |
| $k_{off}^{KCaM2C}$                     | CaM2C dissociation from CaMKII                                                   |                                            | 6.8 s <sup>-1</sup>                      | [1] |
| $K_D^{KCaM2C}$                         | Equilibrium binding of CaM2C to CaMKII                                           | 1.6-8.4 μM                                 | 7.39 μM                                  | [1] |
| $k_{on}^{KCaM2N1C}$                    | CaM2N1C binding to CaMKII                                                        |                                            | 1.9 μM <sup>-1</sup> s <sup>-1</sup>     | [1] |
| $k_{off}^{KCaM2N1C}$                   | CaM2N1C dissociation from CaMKII                                                 |                                            | 1.9 s <sup>-1</sup>                      | [1] |
| $K_D^{KCaM2N1C}$                       | Equilibrium binding of CaM2N1C to CaMKII                                         |                                            | 1.0 μM                                   | [2] |
| $k_{on}^{KCaM1N2C}$                    | CaM1N2C binding to CaMKII                                                        |                                            | 5.2 μM <sup>-1</sup> s <sup>-1</sup>     | [1] |
| $k_{off}^{KCaM1N2C}$                   | CaM1N2C dissociation from CaMKII                                                 |                                            | 3.8 s <sup>-1</sup>                      | [1] |
| $K_D^{KCaM1N2C}$                       | Equilibrium binding of CaM1N2C to CaMKII                                         |                                            | 0.731 μM                                 | [2] |
| $k_{on}^{KCaM4}$                       | CaM4 binding to CaMKII                                                           | 14.0-60.0 μM <sup>-1</sup> s <sup>-1</sup> | 30.0 μM <sup>-1</sup> s <sup>-1</sup>    | [1] |
| $k_{off}^{KCaM4}$                      | CaM4 dissociation from CaMKII                                                    | 1.1-2.3 s <sup>-1</sup>                    | 1.7 s <sup>-1</sup>                      | [1] |
| $K_D^{KCaM4}$                          | Equilibrium binding of CaM4 to CaMKII                                            | 0.04-0.08 μM                               | 0.0567 μM                                | [1] |
| Ca <sup>2+</sup> binding to CaMKII-CaM |                                                                                  |                                            |                                          |     |
| $k_{on}^{K1N}$                         | 1 <sup>st</sup> Ca <sup>2+</sup> binding to CaMKII-CaM N-terminus                |                                            | 76.0 μM <sup>-1</sup> s <sup>-1</sup>    | [1] |
| $k_{off}^{K1N}$                        | 1 <sup>st</sup> Ca <sup>2+</sup> dissociation from CaMKII-CaM N-terminus         |                                            | 300.0 s <sup>-1</sup>                    | [1] |
| $K_D^{K1N}$                            | Equilibrium binding of 1 <sup>st</sup> Ca <sup>2+</sup> to CaMKII-CaM N-terminus |                                            | 3.95 μM                                  | [2] |
| $k_{on}^{K2N}$                         | 2 <sup>nd</sup> Ca <sup>2+</sup> binding to CaMKII-CaM N-terminus                |                                            | 76.0 μM <sup>-1</sup> s <sup>-1</sup>    | [1] |
| $k_{off}^{K2N}$                        | 2 <sup>nd</sup> Ca <sup>2+</sup> dissociation from CaMKII-CaM N-terminus         | 6.0-60.0 s <sup>-1</sup>                   | 29.6 s <sup>-1</sup>                     | [1] |
| $K_D^{K2N}$                            | Equilibrium binding of 2 <sup>nd</sup> Ca <sup>2+</sup> to CaMKII-CaM N-terminus |                                            | 0.39 μM                                  | [2] |
| $k_{on}^{K1C}$                         | 1 <sup>st</sup> Ca <sup>2+</sup> binding to CaMKII-CaM C-terminus                |                                            | 44.0 μM <sup>-1</sup> s <sup>-1</sup>    | [1] |
| $k_{off}^{K1C}$                        | 1 <sup>st</sup> Ca <sup>2+</sup> dissociation from CaMKII-CaM C-terminus         |                                            | 33.0 s <sup>-1</sup>                     | [1] |
| $K_D^{K1C}$                            | Equilibrium binding of 1 <sup>st</sup> Ca <sup>2+</sup> to CaMKII-CaM C-terminus |                                            | 0.75 μM                                  | [2] |
| $k_{on}^{K2C}$                         | 2 <sup>nd</sup> Ca <sup>2+</sup> binding to CaMKII-CaM C-terminus                |                                            | 44.0 μM <sup>-1</sup> s <sup>-1</sup>    | [1] |
| $k_{off}^{K2C}$                        | 2 <sup>nd</sup> Ca <sup>2+</sup> dissociation from CaMKII-CaM C-terminus         | 0.49-4.9 s <sup>-1</sup>                   | 2.7 s <sup>-1</sup>                      | [1] |
| $K_D^{K2C}$                            | Equilibrium binding of 2 <sup>nd</sup> Ca <sup>2+</sup> to CaMKII-CaM C-terminus |                                            | 0.0614 μM                                | [2] |
| CaM binding to MLCK                    |                                                                                  |                                            |                                          |     |
| $k_{on}^{MKCaM0}$                      | CaM0 binding to MLCK                                                             |                                            | 0.00717 μM <sup>-1</sup> s <sup>-1</sup> | [2] |
| $k_{off}^{MKCaM0}$                     | CaM0 dissociation from MLCK                                                      |                                            | 0.132 s <sup>-1</sup>                    | [3] |
| $K_D^{MKCaM0}$                         | Equilibrium binding of CaM0 to MLCK                                              |                                            | 18.4 μM                                  | [4] |
| $k_{on}^{MKCaM1N}$                     | CaM1N binding to MLCK                                                            |                                            | 0.00717 μM <sup>-1</sup> s <sup>-1</sup> | [2] |
| $k_{off}^{MKCaM1N}$                    | CaM1N dissociation from MLCK                                                     |                                            | 0.132 s <sup>-1</sup>                    | [3] |
| $K_D^{MKCaM1N}$                        | Equilibrium binding of CaM1N to MLCK                                             |                                            | 18.4 μM                                  | [4] |



|                                      |                                                                                |                                                   |                                         |         |
|--------------------------------------|--------------------------------------------------------------------------------|---------------------------------------------------|-----------------------------------------|---------|
| $k_{on}^{MKCaM1C}$                   | CaM1C binding to MLCK                                                          |                                                   | $0.00717 \mu\text{M}^{-1}\text{s}^{-1}$ | [2]     |
| $k_{off}^{MKCaM1C}$                  | CaM1C dissociation from MLCK                                                   |                                                   | $0.132 \text{ s}^{-1}$                  | [3]     |
| $K_D^{MKCaM1C}$                      | Equilibrium binding of CaM1C to MLCK                                           |                                                   | $18.4 \mu\text{M}$                      | [4]     |
| $k_{on}^{MKCaM1N1C}$                 | CaM1N1C binding to MLCK                                                        |                                                   | $0.00717 \mu\text{M}^{-1}\text{s}^{-1}$ | [2]     |
| $k_{off}^{MKCaM1N1C}$                | CaM1N1C dissociation from MLCK                                                 |                                                   | $0.132 \text{ s}^{-1}$                  | [3]     |
| $K_D^{MKCaM1N1C}$                    | Equilibrium binding of CaM1N1C to MLCK                                         |                                                   | $18.4 \mu\text{M}$                      | [4]     |
| $k_{on}^{MKCaM2N}$                   | CaM2N binding to MLCK                                                          |                                                   | $2.34 \mu\text{M}^{-1}\text{s}^{-1}$    | [2]     |
| $k_{off}^{MKCaM2N}$                  | CaM2N dissociation from MLCK                                                   |                                                   | $0.132 \text{ s}^{-1}$                  | [3]     |
| $K_D^{MKCaM2N}$                      | Equilibrium binding of CaM2N to MLCK                                           |                                                   | $0.0564 \mu\text{M}$                    | [4]     |
| $k_{on}^{MKCaM2C}$                   | CaM2C binding to MLCK                                                          |                                                   | $0.170 \mu\text{M}^{-1}\text{s}^{-1}$   | [2]     |
| $k_{off}^{MKCaM2C}$                  | CaM2C dissociation from MLCK                                                   |                                                   | $0.132 \text{ s}^{-1}$                  | [3]     |
| $K_D^{MKCaM2C}$                      | Equilibrium binding of CaM2C to MLCK                                           |                                                   | $0.776 \mu\text{M}$                     | [4]     |
| $k_{on}^{MKCaM2N1C}$                 | CaM2N1C binding to MLCK                                                        |                                                   | $2.34 \mu\text{M}^{-1}\text{s}^{-1}$    | [2]     |
| $k_{off}^{MKCaM2N1C}$                | CaM2N1C dissociation from MLCK                                                 |                                                   | $0.132 \text{ s}^{-1}$                  | [3]     |
| $K_D^{MKCaM2N1C}$                    | Equilibrium binding of CaM2N1C to MLCK                                         |                                                   | $0.0564 \mu\text{M}$                    | [4]     |
| $k_{on}^{MKCaM1N2C}$                 | CaM1N2C binding to MLCK                                                        |                                                   | $0.170 \mu\text{M}^{-1}\text{s}^{-1}$   | [2]     |
| $k_{off}^{MKCaM1N2C}$                | CaM1N2C dissociation from MLCK                                                 |                                                   | $0.132 \text{ s}^{-1}$                  | [3]     |
| $K_D^{MKCaM1N2C}$                    | Equilibrium binding of CaM1N2C to MLCK                                         |                                                   | $0.776 \mu\text{M}$                     | [4]     |
| $k_{on}^{MKCaM4}$                    | CaM4 binding to MLCK                                                           | $28.0\text{-}110.0 \mu\text{M}^{-1}\text{s}^{-1}$ | $55.5 \mu\text{M}^{-1}\text{s}^{-1}$    | [13-15] |
| $k_{off}^{MKCaM4}$                   | CaM4 dissociation from MLCK                                                    | $0.031\text{-}0.56 \text{ s}^{-1}$                | $0.132 \text{ s}^{-1}$                  | [13-15] |
| $K_D^{MKCaM4}$                       | Equilibrium binding of CaM4 to MLCK                                            | $0.0011\text{-}0.22 \mu\text{M}$                  | $0.00238 \mu\text{M}$                   | [13-15] |
| Ca <sup>2+</sup> binding to MLCK-CaM |                                                                                |                                                   |                                         |         |
| $k_{on}^{MK1N}$                      | 1 <sup>st</sup> Ca <sup>2+</sup> binding to MLCK-CaM N-terminus                |                                                   | $100.0 \mu\text{M}^{-1}\text{s}^{-1}$   | [6]     |
| $k_{off}^{MK1N}$                     | 1 <sup>st</sup> Ca <sup>2+</sup> dissociation from MLCK-CaM N-terminus         |                                                   | $2500.0 \text{ s}^{-1}$                 | [7]     |
| $K_D^{MK1N}$                         | Equilibrium binding of 1 <sup>st</sup> Ca <sup>2+</sup> to MLCK-CaM N-terminus |                                                   | $25.0 \mu\text{M}$                      | [2]     |
| $k_{on}^{MK2N}$                      | 2 <sup>nd</sup> Ca <sup>2+</sup> binding to MLCK-CaM N-terminus                |                                                   | $150.0 \mu\text{M}^{-1}\text{s}^{-1}$   | [6]     |
| $k_{off}^{MK2N}$                     | 2 <sup>nd</sup> Ca <sup>2+</sup> dissociation from MLCK-CaM N-terminus         | $2.3\text{-}12.5 \text{ s}^{-1}$                  | $2.3 \text{ s}^{-1}$                    | [15-18] |
| $K_D^{MK2N}$                         | Equilibrium binding of 2 <sup>nd</sup> Ca <sup>2+</sup> to MLCK-CaM N-terminus |                                                   | $0.015 \mu\text{M}$                     | [2]     |
| $k_{on}^{MK1C}$                      | 1 <sup>st</sup> Ca <sup>2+</sup> binding to MLCK-CaM C-terminus                |                                                   | $4.0 \mu\text{M}^{-1}\text{s}^{-1}$     | [6]     |
| $k_{off}^{MK1C}$                     | 1 <sup>st</sup> Ca <sup>2+</sup> dissociation from MLCK-CaM C-terminus         |                                                   | $40.0 \text{ s}^{-1}$                   | [7]     |
| $K_D^{MK1C}$                         | Equilibrium binding of 1 <sup>st</sup> Ca <sup>2+</sup> to MLCK-CaM C-terminus |                                                   | $10.0 \mu\text{M}$                      | [2]     |
| $k_{on}^{MK2C}$                      | 2 <sup>nd</sup> Ca <sup>2+</sup> binding to MLCK-CaM C-terminus                |                                                   | $10.0 \mu\text{M}^{-1}\text{s}^{-1}$    | [6]     |
| $k_{off}^{MK2C}$                     | 2 <sup>nd</sup> Ca <sup>2+</sup> dissociation from MLCK-CaM C-terminus         | $0.39\text{-}0.7 \text{ s}^{-1}$                  | $0.39 \text{ s}^{-1}$                   | [15-18] |
| $K_D^{MK2C}$                         | Equilibrium binding of 2 <sup>nd</sup> Ca <sup>2+</sup> to MLCK-CaM C-terminus |                                                   | $0.039 \mu\text{M}$                     | [2]     |



| CaM binding to Ng                  |                                                                              |  |                                       |      |
|------------------------------------|------------------------------------------------------------------------------|--|---------------------------------------|------|
| $k_{on}^{NgCaM0}$                  | CaM0 binding to Ng                                                           |  | 28.0 $\mu\text{M}^{-1}\text{s}^{-1}$  | [19] |
| $k_{off}^{NgCaM0}$                 | CaM0 dissociation from Ng                                                    |  | 36.0 $\text{s}^{-1}$                  | [19] |
| $K_D^{NgCaM0}$                     | Equilibrium binding of CaM0 to Ng                                            |  | 1.29 $\mu\text{M}$                    | [19] |
| $k_{on}^{NgCaM1N}$                 | CaM1N binding to Ng                                                          |  | 28.0 $\mu\text{M}^{-1}\text{s}^{-1}$  | [19] |
| $k_{off}^{NgCaM1N}$                | CaM1N dissociation from Ng                                                   |  | 36.0 $\text{s}^{-1}$                  | [19] |
| $K_D^{NgCaM1N}$                    | Equilibrium binding of CaM1N to Ng                                           |  | 1.29 $\mu\text{M}$                    | [19] |
| $k_{on}^{NgCaM1C}$                 | CaM1C binding to Ng                                                          |  | 23.0 $\mu\text{M}^{-1}\text{s}^{-1}$  | [19] |
| $k_{off}^{NgCaM1C}$                | CaM1C dissociation from Ng                                                   |  | 35.0 $\text{s}^{-1}$                  | [19] |
| $K_D^{NgCaM1C}$                    | Equilibrium binding of CaM1C to Ng                                           |  | 1.52 $\mu\text{M}$                    | [19] |
| $k_{on}^{NgCaM1N1C}$               | CaM1N1C binding to Ng                                                        |  | 23.0 $\mu\text{M}^{-1}\text{s}^{-1}$  | [19] |
| $k_{off}^{NgCaM1N1C}$              | CaM1N1C dissociation from Ng                                                 |  | 35.0 $\text{s}^{-1}$                  | [19] |
| $K_D^{NgCaM1N1C}$                  | Equilibrium binding of CaM1N1C to Ng                                         |  | 1.52 $\mu\text{M}$                    | [19] |
| $k_{on}^{NgCaM2N}$                 | CaM2N binding to Ng                                                          |  | 28.0 $\mu\text{M}^{-1}\text{s}^{-1}$  | [19] |
| $k_{off}^{NgCaM2N}$                | CaM2N dissociation from Ng                                                   |  | 36.0 $\text{s}^{-1}$                  | [19] |
| $K_D^{NgCaM2N}$                    | Equilibrium binding of CaM2N to Ng                                           |  | 1.29 $\mu\text{M}$                    | [19] |
| $k_{on}^{NgCaM2C}$                 | CaM2C binding to Ng                                                          |  | 2.0 $\mu\text{M}^{-1}\text{s}^{-1}$   | [19] |
| $k_{off}^{NgCaM2C}$                | CaM2C dissociation from Ng                                                   |  | 136.0 $\text{s}^{-1}$                 | [19] |
| $K_D^{NgCaM2C}$                    | Equilibrium binding of CaM2C to Ng                                           |  | 68.0 $\mu\text{M}$                    | [19] |
| $k_{on}^{NgCaM2N1C}$               | CaM2N1C binding to Ng                                                        |  | 23.0 $\mu\text{M}^{-1}\text{s}^{-1}$  | [19] |
| $k_{off}^{NgCaM2N1C}$              | CaM2N1C dissociation from Ng                                                 |  | 35.0 $\text{s}^{-1}$                  | [19] |
| $K_D^{NgCaM2N1C}$                  | Equilibrium binding of CaM2N1C to Ng                                         |  | 1.52 $\mu\text{M}$                    | [19] |
| $k_{on}^{NgCaM1N2C}$               | CaM1N2C binding to Ng                                                        |  | 2.0 $\mu\text{M}^{-1}\text{s}^{-1}$   | [19] |
| $k_{off}^{NgCaM1N2C}$              | CaM1N2C dissociation from Ng                                                 |  | 136.0 $\text{s}^{-1}$                 | [19] |
| $K_D^{NgCaM1N2C}$                  | Equilibrium binding of CaM1N2C to Ng                                         |  | 68.0 $\mu\text{M}$                    | [19] |
| $k_{on}^{NgCaM4}$                  | CaM4 binding to Ng                                                           |  | 2.0 $\mu\text{M}^{-1}\text{s}^{-1}$   | [19] |
| $k_{off}^{NgCaM4}$                 | CaM4 dissociation from Ng                                                    |  | 136.0 $\text{s}^{-1}$                 | [19] |
| $K_D^{NgCaM4}$                     | Equilibrium binding of CaM4 to Ng                                            |  | 68.0 $\mu\text{M}$                    | [19] |
| Ca <sup>2+</sup> binding to Ng-CaM |                                                                              |  |                                       |      |
| $k_{on}^{Ng1N}$                    | 1 <sup>st</sup> Ca <sup>2+</sup> binding to Ng-CaM N-terminus                |  | 100.0 $\mu\text{M}^{-1}\text{s}^{-1}$ | [19] |
| $k_{off}^{Ng1N}$                   | 1 <sup>st</sup> Ca <sup>2+</sup> dissociation from Ng-CaM N-terminus         |  | 2500.0 $\text{s}^{-1}$                | [19] |
| $K_D^{Ng1N}$                       | Equilibrium binding of 1 <sup>st</sup> Ca <sup>2+</sup> to Ng-CaM N-terminus |  | 25.0 $\mu\text{M}$                    | [19] |
| $k_{on}^{Ng2N}$                    | 2 <sup>nd</sup> Ca <sup>2+</sup> binding to Ng-CaM N-terminus                |  | 150.0 $\mu\text{M}^{-1}\text{s}^{-1}$ | [19] |
| $k_{off}^{Ng2N}$                   | 2 <sup>nd</sup> Ca <sup>2+</sup> dissociation from Ng-CaM N-terminus         |  | 750.0 $\text{s}^{-1}$                 | [19] |
| $K_D^{Ng2N}$                       | Equilibrium binding of 2 <sup>nd</sup> Ca <sup>2+</sup> to Ng-CaM N-terminus |  | 5.0 $\mu\text{M}$                     | [19] |
| $k_{on}^{Ng1C}$                    | 1 <sup>st</sup> Ca <sup>2+</sup> binding to Ng-CaM C-terminus                |  | 426.0 $\mu\text{M}^{-1}\text{s}^{-1}$ | [19] |
| $k_{off}^{Ng1C}$                   | 1 <sup>st</sup> Ca <sup>2+</sup> dissociation from Ng-CaM C-terminus         |  | 5830.0 $\text{s}^{-1}$                | [19] |

|                                     |                                                                               |                                            |                                       |         |
|-------------------------------------|-------------------------------------------------------------------------------|--------------------------------------------|---------------------------------------|---------|
| $K_D^{Ng1C}$                        | Equilibrium binding of 1 <sup>st</sup> Ca <sup>2+</sup> to Ng-CaM C-terminus  |                                            | 13.7 $\mu\text{M}$                    | [19]    |
| $k_{on}^{Ng2C}$                     | 2 <sup>nd</sup> Ca <sup>2+</sup> binding to Ng-CaM C-terminus                 |                                            | 21.5 $\mu\text{M}^{-1}\text{s}^{-1}$  | [19]    |
| $k_{off}^{Ng2C}$                    | 2 <sup>nd</sup> Ca <sup>2+</sup> dissociation from Ng-CaM C-terminus          |                                            | 418.0 $\text{s}^{-1}$                 | [19]    |
| $K_D^{Ng2C}$                        | Equilibrium binding of 2 <sup>nd</sup> Ca <sup>2+</sup> to Ng-CaM C-terminus  |                                            | 19.4 $\mu\text{M}$                    | [19]    |
| CaM binding to NOS                  |                                                                               |                                            |                                       |         |
| $k_{on}^{NOSCaM0}$                  | CaM0 binding to NOS                                                           |                                            | 0.135 $\mu\text{M}^{-1}\text{s}^{-1}$ | [2]     |
| $k_{off}^{NOSCaM0}$                 | CaM0 dissociation from NOS                                                    |                                            | 0.01 $\text{s}^{-1}$                  | [3]     |
| $K_D^{NOSCaM0}$                     | Equilibrium binding of CaM0 to NOS                                            |                                            | 0.074 $\mu\text{M}$                   | [4]     |
| $k_{on}^{NOSCaM1N}$                 | CaM1N binding to NOS                                                          |                                            | 0.135 $\mu\text{M}^{-1}\text{s}^{-1}$ | [2]     |
| $k_{off}^{NOSCaM1N}$                | CaM1N dissociation from NOS                                                   |                                            | 0.01 $\text{s}^{-1}$                  | [3]     |
| $K_D^{NOSCaM1N}$                    | Equilibrium binding of CaM1N to NOS                                           |                                            | 0.074 $\mu\text{M}$                   | [4]     |
| $k_{on}^{NOSCaM1C}$                 | CaM1C binding to NOS                                                          |                                            | 0.135 $\mu\text{M}^{-1}\text{s}^{-1}$ | [2]     |
| $k_{off}^{NOSCaM1C}$                | CaM1C dissociation from NOS                                                   |                                            | 0.01 $\text{s}^{-1}$                  | [3]     |
| $K_D^{NOSCaM1C}$                    | Equilibrium binding of CaM1C to NOS                                           |                                            | 0.074 $\mu\text{M}$                   | [4]     |
| $k_{on}^{NOSCaM1N1C}$               | CaM1N1C binding to NOS                                                        |                                            | 0.135 $\mu\text{M}^{-1}\text{s}^{-1}$ | [2]     |
| $k_{off}^{NOSCaM1N1C}$              | CaM1N1C dissociation from NOS                                                 |                                            | 0.01 $\text{s}^{-1}$                  | [3]     |
| $K_D^{NOSCaM1N1C}$                  | Equilibrium binding of CaM1N1C to NOS                                         |                                            | 0.074 $\mu\text{M}$                   | [4]     |
| $k_{on}^{NOSCaM2N}$                 | CaM2N binding to NOS                                                          |                                            | 0.135 $\mu\text{M}^{-1}\text{s}^{-1}$ | [2]     |
| $k_{off}^{NOSCaM2N}$                | CaM2N dissociation from NOS                                                   |                                            | 0.01 $\text{s}^{-1}$                  | [3]     |
| $K_D^{NOSCaM2N}$                    | Equilibrium binding of CaM2N to NOS                                           |                                            | 0.074 $\mu\text{M}$                   | [4]     |
| $k_{on}^{NOSCaM2C}$                 | CaM2C binding to NOS                                                          |                                            | 1.25 $\mu\text{M}^{-1}\text{s}^{-1}$  | [2]     |
| $k_{off}^{NOSCaM2C}$                | CaM2C dissociation from NOS                                                   |                                            | 0.01 $\text{s}^{-1}$                  | [3]     |
| $K_D^{NOSCaM2C}$                    | Equilibrium binding of CaM2C to NOS                                           |                                            | 0.008 $\mu\text{M}$                   | [4]     |
| $k_{on}^{NOSCaM2N1C}$               | CaM2N1C binding to NOS                                                        |                                            | 0.135 $\mu\text{M}^{-1}\text{s}^{-1}$ | [2]     |
| $k_{off}^{NOSCaM2N1C}$              | CaM2N1C dissociation from NOS                                                 |                                            | 0.01 $\text{s}^{-1}$                  | [3]     |
| $K_D^{NOSCaM2N1C}$                  | Equilibrium binding of CaM2N1C to NOS                                         |                                            | 0.074 $\mu\text{M}$                   | [4]     |
| $k_{on}^{NOSCaM1N2C}$               | CaM1N2C binding to NOS                                                        |                                            | 1.25 $\mu\text{M}^{-1}\text{s}^{-1}$  | [2]     |
| $k_{off}^{NOSCaM1N2C}$              | CaM1N2C dissociation from NOS                                                 |                                            | 0.01 $\text{s}^{-1}$                  | [3]     |
| $K_D^{NOSCaM1N2C}$                  | Equilibrium binding of CaM1N2C to NOS                                         |                                            | 0.008 $\mu\text{M}$                   | [4]     |
| $k_{on}^{NOSCaM4}$                  | CaM4 binding to NOS                                                           | 0.11-660.0 $\mu\text{M}^{-1}\text{s}^{-1}$ | 1.25 $\mu\text{M}^{-1}\text{s}^{-1}$  | [20-22] |
| $k_{off}^{NOSCaM4}$                 | CaM4 dissociation from NOS                                                    | 0.0023-3.7 $\text{s}^{-1}$                 | 0.01 $\text{s}^{-1}$                  | [20-22] |
| $K_D^{NOSCaM4}$                     | Equilibrium binding of CaM4 to NOS                                            | 0.005-5.6 $\mu\text{M}$                    | 0.008 $\mu\text{M}$                   | [20-24] |
| Ca <sup>2+</sup> binding to NOS-CaM |                                                                               |                                            |                                       |         |
| $k_{on}^{NOS1N}$                    | 1 <sup>st</sup> Ca <sup>2+</sup> binding to NOS-CaM N-terminus                |                                            | 100.0 $\mu\text{M}^{-1}\text{s}^{-1}$ | [6]     |
| $k_{off}^{NOS1N}$                   | 1 <sup>st</sup> Ca <sup>2+</sup> dissociation from NOS-CaM N-terminus         |                                            | 2500.0 $\text{s}^{-1}$                | [25]    |
| $K_D^{NOS1N}$                       | Equilibrium binding of 1 <sup>st</sup> Ca <sup>2+</sup> to NOS-CaM N-terminus |                                            | 25.0 $\mu\text{M}$                    | [2]     |
| $k_{on}^{NOS2N}$                    | 2 <sup>nd</sup> Ca <sup>2+</sup> binding to NOS-CaM N-terminus                |                                            | 150.0 $\mu\text{M}^{-1}\text{s}^{-1}$ | [6]     |

|                   |                                                                               |  |                                       |      |
|-------------------|-------------------------------------------------------------------------------|--|---------------------------------------|------|
| $k_{off}^{NOS2N}$ | 2 <sup>nd</sup> Ca <sup>2+</sup> dissociation from NOS-CaM N-terminus         |  | 750.0 s <sup>-1</sup>                 | [25] |
| $K_D^{NOS2N}$     | Equilibrium binding of 2 <sup>nd</sup> Ca <sup>2+</sup> to NOS-CaM N-terminus |  | 5.0 μM                                | [2]  |
| $k_{on}^{NOS1C}$  | 1 <sup>st</sup> Ca <sup>2+</sup> binding to NOS-CaM C-terminus                |  | 4.0 μM <sup>-1</sup> s <sup>-1</sup>  | [6]  |
| $k_{off}^{NOS1C}$ | 1 <sup>st</sup> Ca <sup>2+</sup> dissociation from NOS-CaM C-terminus         |  | 40.0 s <sup>-1</sup>                  | [7]  |
| $K_D^{NOS1C}$     | Equilibrium binding of 1 <sup>st</sup> Ca <sup>2+</sup> to NOS-CaM C-terminus |  | 10.0 μM                               | [2]  |
| $k_{on}^{NOS2C}$  | 2 <sup>nd</sup> Ca <sup>2+</sup> binding to NOS-CaM C-terminus                |  | 10.0 μM <sup>-1</sup> s <sup>-1</sup> | [6]  |
| $k_{off}^{NOS2C}$ | 2 <sup>nd</sup> Ca <sup>2+</sup> dissociation from NOS-CaM C-terminus         |  | 1.0 s <sup>-1</sup>                   | [25] |
| $K_D^{NOS2C}$     | Equilibrium binding of 2 <sup>nd</sup> Ca <sup>2+</sup> to NOS-CaM C-terminus |  | 0.1 μM                                | [2]  |

References:

- [1] S. Pepke et al., “A Dynamic Model of Interactions of Ca<sup>2+</sup>, Calmodulin, and Catalytic Subunits of Ca<sup>2+</sup>/Calmodulin-Dependent Protein Kinase II,” *PLoS Comput. Biol.*, vol. 6, no. 2, p. e1000675, 2010.
- [2] Calculated from the relationship  $K_D = \frac{k_{off}}{k_{on}}$
- [3] Assume that Ca<sup>2+</sup> binding does not affect the rate of protein dissociation from CaM
- [4] Calculated from the thermodynamic principle of microscopic reversibility
- [5] M. Kim et al., “Colocalization of Protein Kinase A with Adenylyl Cyclase Enhances Protein Kinase A Activity during Long-Lasting Long-Term-Potentiation,” *PLoS Comput. Biol.*, vol. 7, no. 6, p. e1002084, 2011.
- [6] Assume that protein binding does not affect the rate of Ca<sup>2+</sup> association to CaM
- [7] Assume that protein binding does not affect the fast dissociation rate(s) of Ca<sup>2+</sup> from CaM
- [8] N. Masada et al., “Distinct Mechanisms of Calmodulin Binding and Regulation of Adenylyl Cyclases 1 and 8,” *Biochem.*, vol. 51, no. 40, pp. 7917-7929, 2012.
- [9] A.R. Quintana et al., “Kinetics of calmodulin binding to calcineurin,” *BBRC*, vol. 334, pp. 674-680, 2005.
- [10] M.J. Hubbard and C.B. Klee, “Calmodulin Binding by Calcineurin,” *J. Biol. Chem.*, vol. 262, no. 31, pp. 15062-15070, 1987.
- [11] E. Takano, M. Hatanaka, and M. Maki, “Real-time analysis of the calcium-dependent interaction between calmodulin and a synthetic oligopeptide of calcineurin by a surface plasmon resonance biosensor,” *FEBS Letters*, vol. 352, pp. 247-250, 1994.\*
- [12] P.M. Stemmer and C.B. Klee, “Dual Calcium Ion Regulation of Calcineurin by Calmodulin and Calcineurin B,” *Biochem.*, vol. 33, pp. 6859-6866, 1994.
- [13] K. Torok and D.R. Trentham, “Mechanism of 2-Chloro-(ε-amino-Lys<sub>75</sub>)-[6-[4-(N,N-diethylamino)phenyl]-1,3,5-triazin-4-yl]calmodulin Interactions with Smooth Muscle Myosin Light Chain Kinase and Derived Peptides,” *Biochem.*, vol. 33, pp. 12807-12820, 1994.

- [14] R. Kasturi, C. Vasulka, and J.D. Johnson, "Ca<sup>2+</sup>, Caldesmon, and Myosin Light Chain Kinase Exchange with Calmodulin," *J. Biol. Chem.*, vol. 268, pp. 7958-7964, 1993.
- [15] M.C. Potier et al., "The Human Myosin Light Chain Kinase (MLCK) from Hippocampus: Cloning, Sequencing, Expression, and Localization to 3qcen-q21," *Genomics*, vol. 29, no. 3, pp. 562-570, 1995.†
- [17] J.D. Johnson et al., "Effects of Myosin Light Chain Kinase and Peptides on Ca<sup>2+</sup> Exchange with the N- and C-terminal Ca<sup>2+</sup> Binding Sites of Calmodulin," *J. Biol. Chem.*, pp. 761-767, 1996.
- [18] O.B. Peersen, T.S. Madsen, and J.J. Falke, "Intermolecular tuning of calmodulin by target peptides and proteins: Differential effects of Ca<sup>2+</sup> binding and implications for kinase activation," *Protein Sci.*, vol. 6, pp. 794-807, 1997.\*
- [19] Y. Kubota, J. Putkey, and M. Waxham, "Neurogranin Controls the Spatiotemporal Pattern of Postsynaptic Ca<sup>2+</sup>/CaM signaling," *Biophys. J.*, vol. 93, pp. 3848-3859, 2007.
- [20] J.L. McMurry et al., "Rate, Affinity and Calcium Dependence of Nitric Oxide Synthase Isoform Binding to the Primary Physiological Regulator Calmodulin," *FEBS J.*, vol. 278, pp. 4943-4954, 2011.
- [21] G. Wu, V. Berka, and A. Tsai, "Binding Kinetics of Calmodulin with Target Peptides of Three Nitric Oxide Synthase Isozymes," *J. Inorg. Biochem.*, vol. 105, pp. 1226-1237, 2011.\*
- [22] M. Zoche et al., "Distinct Molecular Recognition of Calmodulin-Binding Sites in the Neuronal and Macrophage Nitric Oxide Synthases: A Surface Plasmon Resonance Study," *Biochem.*, vol. 35, pp. 8742-8747, 1996.\*
- [23] E.A. Sheta, K. McMillan, and B.S. Siler Masters, "Evidence for a Bidomain Structure of Constitutive Cerebellar Nitric Oxide Synthase," *J. Biol. Chem.*, vol. 269, no. 21, pp. 15147-15153, 1994.
- [24] B.A. Weissman et al., "Activation and Inactivation of Neuronal Nitric Oxide Synthase: Characterization of Ca<sup>2+</sup>-dependent [<sup>125</sup>I]Calmodulin Binding," *Eur. J. Pharm.*, vol. 435, pp. 9-18, 2002.
- [25] A. Persechini, H.D. White, and K.J. Gansz, "Different Mechanisms for Ca<sup>2+</sup> Dissociation from Complexes of Calmodulin with Nitric Oxide Synthase or Myosin Light Chain Kinase," *J. Biol. Chem.*, vol. 271, no. 1, pp. 62-67, 1996.

\*Not used in calculating average value because study used oligopeptide instead of protein

†Used to establish equivalence of smooth muscle and hippocampal MLCK

‡Used to select rates of MLCK association to and dissociation from Ca<sup>2+</sup><sub>4</sub>CaM

§Used to select rates of Ca<sup>2+</sup> dissociation from NOS-CaM
