# Supplementary material for: Competitive tuning: Competition's role in setting the frequency-dependence of Ca2+-dependent proteins
Source: PubMed Central journal article supplement (PMC5690689; doi:10.1371/journal.pcbi.1005820), 2017-11-06
Supplement: pcbi.1005820.s003.pdf [file pcbi.1005820.s003.pdf]

**Contents:**

- Discussion of Sensitivity Analysis Results
- Table S2. Sensitivity Analysis Results for Varying Initial Concentrations
- Table S3. Sensitivity Analysis Results for Varying Rate Constant Values

*Discussion of Sensitivity Analysis Results*

Among all initial concentrations, the initial concentration of CaM had the greatest impact on almost all model outputs, regardless of  $\text{Ca}^{2+}$  frequency. In fact, this held true for all model outputs except the average bound concentration of NOS. This reaffirms one of the observations that motivated this study: that ultimately, the concentration of CaM is the limiting factor of CaM-dependent enzyme activation in dendritic spines. Apart from CaM, Ng, and CaMKII are the only other proteins whose concentration variations significantly impacted (i.e., PRCC greater than 0.5) multiple model outputs. The concentration of Ng had a significant impact on the greatest number of model outputs at 1 Hz and on the least number of model outputs at 100 Hz. Conversely, the concentration of CaMKII had a significant impact on the greatest number of model outputs at 100 Hz and on the least number of model outputs at 1 Hz. This implies that Ng serves as the primary CaM buffer at low  $\text{Ca}^{2+}$  frequencies, while CaMKII serves as the primary CaM buffer at high  $\text{Ca}^{2+}$  frequencies. In fact, Ng is such an effective CaM buffer at low frequencies that, at 1 Hz, the average bound concentration of AC8-Ct was actually more affected by variations in the concentration of Ng than by variations in its own concentration.

Among all kinetic rate constants, the association rate of CaMKII to  $\text{CaM}_4$  ( $k_{\text{on}}^{\text{KCaM}_4}$ ) significantly impacted the greatest number of model outputs at all  $\text{Ca}^{2+}$  frequencies. Its variation had a significant impact on five model outputs at 1 Hz, six at 10 Hz, and seven at 100 Hz. At 1 Hz,  $k_{\text{off}}^{\text{NgCaM}_0}$ ,  $k_{\text{on}}^{\text{Ng}_2\text{C}}$ ,  $k_{\text{off}}^{\text{Ng}_2\text{C}}$ , and  $k_{\text{on}}^{2\text{N}}$  also significantly impacted several model outputs (five, four, three, and three model outputs, respectively). And at 10 Hz,  $k_{\text{on}}^{1\text{N}}$  significantly impacted

five model outputs.  $k_{\text{on}}^{\text{KCaM4}}$  was the only parameter that significantly impacted more than two model outputs at 100 Hz. Interestingly, the values of all six of these most impactful parameters were obtained from literature. And in fact, the values of very few of the parameters that significantly impacted model outputs were based on the assumptions of this study. This includes both values that were directly assumed and those that were calculated from directly-assumed values. For example, at 1 Hz, just 12 of the 52 significantly impactful parameters were assumed; at 10 Hz, just 4 of the 37 significantly impactful parameters were assumed; and at 100 Hz, just 3 of the 32 significantly impactful parameters were assumed. The parameters that appear to have the greatest effect on model outputs are also those that have been experimentally characterized.

In general, the full results of this global sensitivity analysis could be used by experimenters to prioritize the measurement of rate constants, as some parameters, despite having either no measured value or a contentious value, may ultimately have little effect on relevant output measures.

Table S2. Sensitivity Analysis Results for Varying Initial Concentrations. PRCC values for varying initial protein concentrations. Columns denote initial concentrations; rows denote CaM-bound output.

| Constant Initial Concentrations |            |          |          |          |          |          |          |          |          |
|---------------------------------|------------|----------|----------|----------|----------|----------|----------|----------|----------|
| 1Hz                             |            | C_AC1    | C_AC8-Ct | C_AC8-Nt | C_CaN    | C_CaMKII | C_MLCK   | C_Ng     | C_NOS    |
|                                 | concCaM    | 0.952959 | 0.954758 | 0.962876 | 0.945645 | 0.976528 | 0.929931 | 0.976729 | 0.794361 |
|                                 | concAC1    | 0.912338 | -0.09408 | -0.08001 | -0.23616 | -0.15396 | -0.1548  | -0.08498 | -0.02735 |
|                                 | concAC8ct  | -0.00148 | 0.897934 | -0.01571 | -0.05863 | -0.0159  | -0.07945 | -0.06604 | -0.06916 |
|                                 | concAC8nt  | -0.31393 | -0.25592 | 0.908121 | -0.32737 | -0.53406 | -0.22211 | -0.22055 | -0.01543 |
|                                 | concCaN    | 0.036581 | 0.027835 | -0.00437 | 0.932162 | 0.018235 | 0.041947 | 0.013956 | -0.00674 |
|                                 | concCaMKII | -0.73987 | -0.30047 | -0.28354 | -0.87643 | 0.910497 | -0.70863 | 0.151604 | -0.0232  |
|                                 | concMLCK   | -0.20331 | -0.16462 | -0.13536 | -0.21737 | -0.26232 | 0.927528 | -0.16517 | -0.02072 |
|                                 | concNg     | -0.72015 | -0.91221 | -0.88906 | -0.18266 | -0.84416 | -0.66441 | 0.79466  | -0.68886 |
|                                 | concNOS    | -0.08369 | -0.0758  | -0.03364 | -0.09518 | -0.0954  | -0.1172  | -0.09874 | 0.996034 |
|                                 |            |          |          |          |          |          |          |          |          |
| 10Hz                            |            | C_AC1    | C_AC8-Ct | C_AC8-Nt | C_CaN    | C_CaMKII | C_MLCK   | C_Ng     | C_NOS    |
|                                 | concCaM    | 0.9509   | 0.949779 | 0.956668 | 0.956444 | 0.97659  | 0.938134 | 0.975863 | 0.807618 |
|                                 | concAC1    | 0.920364 | -0.12375 | -0.1412  | -0.29288 | -0.29127 | -0.13659 | -0.18439 | -0.07299 |
|                                 | concAC8ct  | -0.14049 | 0.902862 | -0.04429 | -0.10434 | -0.11449 | -0.05375 | -0.16409 | -0.04491 |
|                                 | concAC8nt  | -0.43869 | -0.24723 | 0.9116   | -0.41397 | -0.66574 | -0.25643 | -0.44724 | -0.0492  |
|                                 | concCaN    | 0.01596  | 0.030503 | 0.025361 | 0.944233 | 0.038689 | -0.01906 | 0.001559 | 0.048745 |
|                                 | concCaMKII | -0.81769 | -0.51861 | -0.45092 | -0.89995 | 0.917716 | -0.73917 | -0.2929  | 0.003817 |
|                                 | concMLCK   | -0.22707 | -0.1679  | -0.16783 | -0.32405 | -0.29334 | 0.934001 | -0.17237 | -0.03465 |
|                                 | concNg     | -0.46226 | -0.87519 | -0.74411 | -0.09377 | -0.43526 | -0.61667 | 0.882669 | -0.72379 |
|                                 | concNOS    | -0.08061 | -0.03576 | -0.08902 | -0.09315 | -0.13173 | -0.10553 | -0.11608 | 0.99596  |
|                                 |            |          |          |          |          |          |          |          |          |
| 100Hz                           |            | C_AC1    | C_AC8-Ct | C_AC8-Nt | C_CaN    | C_CaMKII | C_MLCK   | C_Ng     | C_NOS    |
|                                 | concCaM    | 0.962139 | 0.943993 | 0.958877 | 0.93872  | 0.982692 | 0.935358 | 0.974492 | 0.82285  |
|                                 | concAC1    | 0.935029 | -0.0988  | -0.07235 | -0.23149 | -0.44155 | -0.15723 | -0.05771 | -0.03787 |
|                                 | concAC8ct  | -0.11372 | 0.878528 | -0.03797 | -0.07548 | -0.15584 | -0.04341 | -0.06905 | 0.030624 |
|                                 | concAC8nt  | -0.2239  | -0.14853 | 0.919727 | -0.24417 | -0.38543 | -0.19203 | -0.08357 | -0.0152  |
|                                 | concCaN    | -0.00346 | 0.032231 | -0.00833 | 0.921361 | 0.032549 | 0.019561 | -0.00168 | -0.01624 |
|                                 | concCaMKII | -0.9118  | -0.64275 | -0.63972 | -0.89812 | 0.860292 | -0.803   | -0.24912 | 0.024234 |
|                                 | concMLCK   | -0.26712 | -0.09962 | -0.0785  | -0.20822 | -0.41343 | 0.935192 | -0.09085 | -0.01557 |
|                                 | concNg     | -0.25592 | -0.83771 | -0.7505  | 0.112349 | 0.288976 | -0.49936 | 0.792419 | -0.75266 |
|                                 | concNOS    | -0.1405  | -0.05433 | -0.07082 | -0.10349 | -0.17101 | -0.05583 | -0.16126 | 0.996039 |

Table S3. Sensitivity Analysis Results for Varying Rate Constant Values. PRCC values for varied rate constant values. Here, rows denote varied input; columns denote the output parameter (as before, concentration of CaM-bound protein).

| Constant Kinetic Parameters |                |          |          |          |          |          |          |          |          |
|-----------------------------|----------------|----------|----------|----------|----------|----------|----------|----------|----------|
| 1Hz                         |                | C_AC1    | C_AC8-Ct | C_AC8-Nt | C_CaN    | C_CaMKII | C_MLCK   | C_Ng     | C_NOS    |
|                             | kon1N          | 0.405276 | 0.539947 | -0.37632 | 0.413439 | 0.296435 | 0.554572 | -0.24589 | 0.297035 |
|                             | koff1N         | 0.040586 | 0.030919 | 0.019915 | 0.050456 | -0.02027 | -0.01054 | -0.02077 | -0.05852 |
|                             | kon2N          | 0.466128 | -0.31911 | 0.51252  | 0.361525 | 0.521115 | 0.462081 | -0.6016  | 0.29239  |
|                             | koff2N         | 0.028331 | 0.044832 | -0.00901 | 0.021028 | 0.003598 | 0.054893 | -0.06758 | 0.013814 |
|                             | kon1C          | -0.01703 | 0.021513 | -0.00408 | 0.054363 | 0.017564 | 0.015112 | -0.052   | -0.01609 |
|                             | koff1C         | 0.010541 | 0.038815 | -0.00987 | 0.003785 | -0.01435 | 0.054649 | 0.01088  | -0.01908 |
|                             | kon2C          | -0.02745 | 0.015128 | -0.01053 | 0.024223 | -0.00535 | -0.01457 | 0.004622 | -0.05211 |
|                             | koff2C         | -0.0594  | 0.025935 | -0.0563  | 0.012646 | -0.01892 | -0.03268 | 0.037681 | 0.017721 |
|                             | konAC11N       | 0.0107   | -0.00831 | -0.03057 | -0.0214  | 0.028479 | 0.001062 | -0.01804 | -0.01646 |
|                             | konAC12N       | -0.03971 | -0.00144 | -0.02005 | -0.05434 | -0.1172  | -0.03574 | 0.067806 | -0.0522  |
|                             | konAC11C       | -0.01024 | 7.68E-05 | 0.032147 | -0.02735 | -0.00336 | -0.00075 | 0.015161 | 0.023515 |
|                             | konAC12C       | -0.01096 | -0.01036 | 0.01905  | 0.005857 | -0.00421 | -0.044   | 0.028471 | 0.039707 |
|                             | koffAC11N      | 0.024214 | 0.007645 | 0.001245 | 0.021947 | 0.009173 | 0.017772 | 0.019073 | 0.023995 |
|                             | koffAC12N      | -0.05452 | -0.01961 | -0.06593 | -0.06307 | -0.00522 | -0.01078 | 0.032592 | -0.04653 |
|                             | koffAC11C      | -0.00403 | 0.005434 | -0.08018 | -0.02417 | -0.03217 | 0.003171 | 0.029836 | 0.046559 |
|                             | koffAC12C      | 0.009307 | 0.023451 | -0.06265 | -0.04826 | -0.04735 | -0.00621 | 0.074663 | -0.01382 |
|                             | konAC1CaM0     | 0.115696 | 0.029989 | -0.03807 | -0.01544 | 0.000176 | 0.040415 | -0.01707 | -0.03825 |
|                             | konAC1CaM2N    | 0.157357 | 0.010749 | 0.063359 | 0.077764 | 0.048142 | 0.013751 | -0.04434 | 0.084502 |
|                             | konAC1CaM2C    | 0.389584 | 0.044876 | -0.06534 | -0.03445 | -0.01758 | -0.00259 | -0.03858 | -0.07164 |
|                             | konAC1CaM4     | 0.872825 | -0.12028 | -0.13027 | -0.16362 | -0.19505 | -0.24706 | -0.1488  | -0.10433 |
|                             | koffAC1CaM0    | -0.70848 | -0.00092 | 0.032017 | 0.065756 | 0.05172  | 0.001758 | 0.173742 | 0.035986 |
|                             | koffAC1CaM2N   | -0.09447 | 0.013918 | 0.041659 | -0.00326 | -0.00958 | -0.06325 | -0.00057 | -0.01132 |
|                             | koffAC1CaM2C   | -0.66685 | 0.007967 | 0.153269 | -0.0325  | 0.031031 | -0.01437 | 0.113529 | -0.03586 |
|                             | koffAC1CaM4    | -0.26941 | 0.046484 | -0.08058 | 0.015604 | 0.066979 | 0.033189 | 0.086984 | 0.024002 |
|                             | konAC8ct1N     | -0.00507 | 0.042217 | -0.028   | 0.014798 | 0.036205 | 0.032759 | 0.002565 | 0.056169 |
|                             | konAC8ct2N     | 0.042941 | 0.003206 | 0.023011 | 0.080485 | 0.025584 | 0.052485 | -0.04838 | -0.03339 |
|                             | konAC8ct1C     | 0.015675 | -0.02135 | -0.0346  | 0.046342 | -0.03236 | -0.01872 | -0.02957 | -0.00485 |
|                             | konAC8ct2C     | -0.04712 | 0.005027 | -0.02599 | -0.05533 | -0.024   | -0.06451 | 0.066572 | -0.01199 |
|                             | koffAC8ct1N    | 0.014842 | -0.04927 | 0.007033 | 0.003184 | -0.02384 | 0.037472 | -0.03384 | 0.01869  |
|                             | koffAC8ct2N    | 0.036326 | -0.03372 | 0.013843 | 0.004298 | 0.03565  | 0.00954  | -0.0065  | -0.01084 |
|                             | koffAC8ct1C    | -0.02301 | -0.03857 | -0.04318 | -0.0225  | -0.0008  | -0.04618 | -0.00802 | -0.0562  |
|                             | koffAC8ct2C    | -0.01261 | 0.000312 | -0.01975 | 0.018686 | 0.019271 | -0.0086  | -0.01078 | -0.02581 |
|                             | konAC8ctCaM0   | -0.02091 | 0.371302 | -0.02101 | -0.0097  | 0.003231 | -0.02941 | -0.03619 | 0.031697 |
|                             | konAC8ctCaM2N  | -0.05192 | 0.555076 | -0.03465 | -0.03424 | 0.000934 | -0.03097 | -0.01199 | -0.0235  |
|                             | konAC8ctCaM2C  | -0.00891 | 0.043146 | -0.07508 | -0.03975 | 0.040661 | 0.002013 | 0.011036 | -0.02842 |
|                             | konAC8ctCaM4   | -0.07809 | 0.69954  | -0.0368  | -0.03666 | -0.02067 | -0.14485 | 0.000903 | -0.02625 |
|                             | koffAC8ctCaM0  | -0.00141 | -0.71155 | 0.024042 | 0.011463 | 0.062601 | 0.041724 | 0.062892 | 0.034822 |
|                             | koffAC8ctCaM2N | -0.03709 | -0.63203 | 0.004501 | -0.03595 | 0.053655 | 0.015432 | 0.091839 | 0.038554 |
|                             | koffAC8ctCaM2C | 0.009589 | -0.03528 | 0.009524 | -0.00443 | 0.028691 | -0.03913 | 0.028208 | 0.024179 |
|                             | koffAC8ctCaM4  | -0.0063  | -0.1227  | -0.01673 | 0.04374  | -0.01405 | 0.019035 | 0.006563 | 0.018398 |
|                             | konAC8nt1N     | -0.00409 | 0.017176 | -0.01976 | 0.029047 | 0.021581 | -0.03127 | 0.017228 | 0.027782 |
|                             | konAC8nt2N     | 0.041063 | -0.01171 | -0.00225 | 0.048509 | 0.005306 | 0.041306 | -0.02111 | 0.037377 |
|                             | konAC8nt1C     | 0.006292 | 0.01741  | 0.011342 | 0.061221 | 0.082144 | 0.002483 | -0.03321 | -0.01409 |
|                             | konAC8nt2C     | -0.00393 | 0.003782 | 0.006484 | 0.023581 | -0.00819 | -0.0271  | 0.009444 | -0.04992 |
|                             | koffAC8nt1N    | -0.00555 | -0.00438 | -0.02063 | -0.02273 | 0.019747 | 0.035619 | 0.047292 | 0.024851 |
|                             | koffAC8nt2N    | 0.050141 | -0.02255 | -0.02728 | 0.029682 | 0.019499 | 0.021141 | 0.03525  | 0.018172 |
|                             | koffAC8nt1C    | -0.03553 | -0.01207 | -0.03752 | -0.04445 | 0.018836 | -0.03438 | 0.0463   | -0.04262 |
|                             | koffAC8nt2C    | -0.10326 | 0.028504 | -0.16695 | -0.00669 | -0.1     | -0.10151 | 0.141484 | -0.01486 |
|                             | konAC8ntCaM0   | -0.07684 | -0.00571 | 0.135288 | -0.01957 | 0.004489 | -0.05117 | -0.0653  | 0.009904 |
|                             | konAC8ntCaM2N  | 0.053912 | 0.035722 | -0.00969 | 0.020233 | 0.021266 | 0.067245 | -0.04238 | -0.02359 |
|                             | konAC8ntCaM2C  | -0.29944 | -0.18164 | 0.878229 | -0.15448 | -0.31923 | -0.27959 | -0.55054 | -0.11536 |
|                             | konAC8ntCaM4   | -0.02281 | -0.0299  | 0.156313 | 0.031169 | -0.08117 | -0.05479 | -0.04275 | 0.008226 |
|                             | koffAC8ntCaM0  | 0.069322 | 0.133115 | -0.56072 | 0.011924 | 0.058687 | 0.06772  | 0.279336 | -0.00812 |
|                             | koffAC8ntCaM2N | 0.012644 | 0.027236 | -0.04254 | 0.096315 | -0.01815 | 0.060727 | 0.010667 | 0.010373 |
|                             | koffAC8ntCaM2C | 0.170355 | 0.134376 | -0.79486 | 0.091415 | 0.248765 | 0.124333 | 0.474833 | 0.046358 |
|                             | koffAC8ntCaM4  | 0.029609 | -0.00028 | 0.029336 | 0.000317 | -0.00551 | -0.0237  | 0.000346 | -0.03191 |
|                             | konPP1N        | 0.05735  | -0.02485 | -0.04297 | -0.01631 | -0.04325 | -0.01255 | 0.040667 | 0.03004  |
|                             | konPP2N        | -0.02336 | -0.03609 | 0.022196 | -0.01204 | 0.022636 | -0.00153 | -0.036   | 0.010106 |
|                             | konPP1C        | 0.005988 | -0.00403 | 0.038532 | -0.06299 | 0.041813 | -0.02955 | 0.000317 | -0.02795 |
|                             | konPP2C        | -0.04373 | 0.034723 | -0.02146 | 0.057705 | -0.02335 | 0.037194 | 0.008342 | -0.0216  |
|                             | koffPP1N       | 0.060488 | -0.02953 | 0.013626 | 0.051018 | 0.061364 | 0.009555 | -0.03329 | 0.075053 |
|                             | koffPP2N       | 0.027299 | 0.024592 | -0.00654 | 0.042106 | 0.010477 | 0.057322 | 0.011073 | -0.01496 |
|                             | koffPP1C       | -0.00166 | -0.05085 | -0.00199 | 0.007314 | -0.08536 | 0.029956 | 0.04896  | -0.01693 |
|                             | koffPP2C       | 0.02127  | -0.00822 | 0.043713 | 0.030536 | 0.034475 | 0.047844 | -0.02607 | -0.03808 |



| 10Hz |                | C_AC1    | C_AC8-Ct | C_AC8-Nt | C_CaN    | C_CaMKII | C_MLCK   | C_Ng     | C_NOS    |
|------|----------------|----------|----------|----------|----------|----------|----------|----------|----------|
|      | kon1N          | 0.544922 | 0.630539 | -0.68642 | 0.443254 | 0.500212 | 0.642021 | -0.36853 | 0.194233 |
|      | koff1N         | 0.023581 | 0.014253 | 0.010625 | 0.035087 | 0.073649 | 0.047867 | -0.06525 | -0.05791 |
|      | kon2N          | 0.360651 | -0.42599 | 0.375061 | 0.283905 | 0.382987 | 0.336139 | -0.62592 | 0.110454 |
|      | koff2N         | 0.014798 | 0.002866 | -0.02942 | -0.06928 | 0.010166 | -0.04822 | -0.01552 | -0.03055 |
|      | kon1C          | -0.00626 | -0.00156 | -0.02647 | -0.0339  | -0.01809 | -0.02026 | 0.013498 | -0.01588 |
|      | koff1C         | -0.08124 | -0.01442 | -0.02725 | -0.02963 | 0.010317 | 0.003176 | -0.01206 | -0.07975 |
|      | kon2C          | 0.02826  | -0.00116 | -0.01619 | -0.00981 | 0.055482 | 0.025687 | -0.02451 | 0.007156 |
|      | koff2C         | 0.049074 | 0.058415 | -0.01451 | 0.048158 | -0.01449 | 0.037081 | -0.03954 | -0.02676 |
|      | konAC11N       | -0.03488 | -0.02182 | -0.03818 | -0.01518 | -0.04503 | 0.005289 | 0.024516 | 0.045895 |
|      | konAC12N       | 0.006104 | -0.01789 | -0.0175  | -0.02564 | 0.004842 | 0.001513 | -0.00126 | -0.07748 |
|      | konAC11C       | 0.031368 | 0.005655 | -0.01309 | 0.00347  | 0.020379 | 0.011703 | -0.02247 | -0.02804 |
|      | konAC12C       | 0.025268 | -0.03349 | -0.01986 | -0.05041 | 0.041759 | 0.028977 | -0.08376 | 0.040549 |
|      | koffAC11N      | -0.02624 | 0.014046 | 0.066387 | -0.0253  | 0.057944 | 0.025892 | 0.035093 | 0.118037 |
|      | koffAC12N      | -0.04738 | -0.01519 | 0.018884 | -0.03297 | -0.05757 | -0.01725 | 0.038539 | -0.09357 |
|      | koffAC11C      | -0.06097 | 0.024797 | 0.00639  | 0.021686 | 0.029268 | -0.00723 | -0.0085  | -0.00132 |
|      | koffAC12C      | -0.01836 | -0.03565 | 0.000264 | 0.011547 | -0.02085 | -0.00999 | 0.001415 | -0.0417  |
|      | konAC1CaM0     | 0.071218 | -0.03383 | 0.001697 | -0.00383 | 0.00874  | -0.04525 | -0.04022 | -0.00357 |
|      | konAC1CaM2N    | 0.011057 | 0.021899 | -0.00741 | -0.01899 | -0.02845 | -0.05447 | 0.033863 | 0.011525 |
|      | konAC1CaM2C    | 0.290962 | 0.005804 | -0.00823 | 0.017191 | -0.05767 | 0.014386 | -0.03289 | -0.02672 |
|      | konAC1CaM4     | 0.924266 | -0.21929 | -0.1956  | -0.21123 | -0.40207 | -0.33574 | -0.14991 | -0.1728  |
|      | koffAC1CaM0    | -0.11429 | -0.02108 | 0.100199 | 0.055218 | -0.00311 | -0.02893 | 0.039126 | -0.01337 |
|      | koffAC1CaM2N   | -0.11116 | -0.00736 | -0.0248  | -0.01311 | 0.0093   | -0.03714 | 0.000796 | 0.026685 |
|      | koffAC1CaM2C   | -0.25385 | 0.045785 | 0.053924 | -0.0265  | -0.02811 | -0.00209 | 0.096384 | -0.02214 |
|      | koffAC1CaM4    | -0.5271  | 0.101863 | 0.014513 | 0.033191 | 0.098646 | 0.028271 | 0.039198 | 0.057503 |
|      | konAC8ct1N     | 0.021298 | 0.023967 | -0.00832 | 0.011683 | 0.016083 | -0.01101 | -0.05324 | -0.01524 |
|      | konAC8ct2N     | -0.02396 | 0.026742 | -0.0059  | 0.031227 | -0.02103 | -0.04087 | 0.035595 | -0.02408 |
|      | konAC8ct1C     | -0.02029 | 0.004186 | -0.03766 | -0.00307 | -0.01189 | -0.0029  | 0.044255 | 0.018465 |
|      | konAC8ct2C     | -0.01364 | 0.043672 | -0.01219 | -0.00465 | 0.066492 | -0.01476 | 0.044674 | 0.01071  |
|      | koffAC8ct1N    | -0.00499 | 0.057753 | 0.014119 | -0.01989 | -0.03318 | 0.007997 | -0.01303 | -0.01714 |
|      | koffAC8ct2N    | -0.03775 | -0.01821 | -0.00515 | -0.01657 | -0.01531 | 0.026674 | -0.01019 | -0.06794 |
|      | koffAC8ct1C    | -0.02943 | -0.06596 | 0.023613 | -0.04465 | -0.04443 | -0.00673 | 0.041994 | 0.029993 |
|      | koffAC8ct2C    | -0.07207 | -0.05278 | -0.034   | -0.05984 | -0.01908 | -0.08479 | 0.07256  | -0.02288 |
|      | konAC8ctCaM0   | -0.03473 | 0.222534 | 0.017625 | 0.089971 | -0.00415 | -0.02558 | -0.00993 | 0.039064 |
|      | konAC8ctCaM2N  | -0.03513 | 0.591414 | -0.00409 | -0.03507 | -0.05586 | -0.03217 | -0.04327 | -0.00051 |
|      | konAC8ctCaM2C  | 0.008692 | 0.047819 | 0.037737 | 0.056597 | 0.011658 | -0.00912 | 0.057884 | 0.051261 |
|      | konAC8ctCaM4   | -0.11296 | 0.829469 | -0.04111 | -0.01236 | -0.09661 | -0.09013 | 0.005755 | 0.00414  |
|      | koffAC8ctCaM0  | 0.014073 | -0.26184 | 0.017485 | 0.003996 | 0.039412 | 0.002007 | 0.029522 | -0.07204 |
|      | koffAC8ctCaM2N | 0.003228 | -0.49715 | 0.010912 | 0.002287 | 0.005378 | 0.023235 | 0.026113 | -0.02636 |
|      | koffAC8ctCaM2C | 0.008008 | -0.01832 | 0.007441 | -0.0002  | 0.018409 | -0.03681 | 0.012517 | 0.050485 |
|      | koffAC8ctCaM4  | 0.07871  | -0.3341  | -0.01361 | -0.03279 | 0.04656  | 0.031036 | -0.01471 | -0.00259 |
|      | konAC8nt1N     | -0.04188 | -0.02644 | -0.02173 | 0.023614 | 0.001364 | 0.003556 | 0.012382 | 0.04285  |
|      | konAC8nt2N     | -0.0148  | 0.051348 | -0.00792 | 0.047135 | 0.021876 | -0.02569 | -0.01173 | 0.042841 |
|      | konAC8nt1C     | 0.019363 | 0.01049  | 0.050917 | -0.04656 | -0.06031 | -0.00551 | 0.013464 | 0.013529 |
|      | konAC8nt2C     | -0.00423 | 0.0295   | 0.040705 | 0.019906 | 0.010199 | -0.00815 | -0.02318 | 0.037485 |
|      | koffAC8nt1N    | 0.004385 | 0.026383 | -0.02451 | -0.06567 | -0.0459  | -0.0509  | 0.04355  | -0.0002  |
|      | koffAC8nt2N    | -0.00171 | 0.011886 | 0.001935 | 0.019774 | -0.02062 | -0.01404 | 0.023831 | 0.032878 |
|      | koffAC8nt1C    | 0.04515  | 0.071841 | 0.039863 | 0.016977 | -0.02577 | 0.080481 | -0.00375 | 0.004152 |
|      | koffAC8nt2C    | -0.02287 | -0.00549 | -0.02646 | -0.0093  | 0.014082 | 0.031214 | 0.044537 | -0.03758 |
|      | konAC8ntCaM0   | -0.03145 | -0.00807 | 0.102526 | -0.00481 | -0.06355 | -0.01214 | -0.00064 | -0.01468 |
|      | konAC8ntCaM2N  | 0.013057 | -0.0341  | -0.03647 | -0.0115  | -0.09341 | -0.04467 | 0.06252  | -0.00036 |
|      | konAC8ntCaM2C  | -0.35231 | -0.24959 | 0.872526 | -0.1531  | -0.53773 | -0.30122 | -0.2229  | -0.09578 |
|      | konAC8ntCaM4   | -0.02182 | -0.00091 | 0.237509 | -0.09037 | -0.14961 | -0.05213 | -0.03043 | -0.06698 |
|      | koffAC8ntCaM0  | 0.027426 | 0.036781 | -0.18595 | 0.058664 | 0.079192 | 0.041991 | 0.02326  | -0.0108  |
|      | koffAC8ntCaM2N | 0.023819 | 0.064614 | -0.03271 | -0.01565 | 0.014663 | -0.00323 | 0.019125 | 0.012398 |
|      | koffAC8ntCaM2C | 0.122206 | 0.131506 | -0.56628 | 0.073909 | 0.206633 | 0.061692 | 0.148871 | 0.037963 |
|      | koffAC8ntCaM4  | 0.049367 | 0.045801 | 0.013165 | 0.01972  | -0.04575 | 0.01988  | 0.021255 | 0.009972 |
|      | konPP1N        | 0.042968 | -0.00288 | -0.02633 | 0.049743 | 0.015333 | -0.02534 | 0.004048 | 0.007851 |
|      | konPP2N        | -0.00603 | -0.03702 | 0.057197 | -0.06113 | -0.01512 | 0.025811 | -0.06564 | 0.053674 |
|      | konPP1C        | 0.005699 | 0.063927 | -0.05853 | 0.044525 | -0.04311 | -0.02964 | 0.035308 | -0.04282 |
|      | konPP2C        | 0.041814 | -0.01623 | -0.01243 | 0.029077 | 0.021309 | 0.004531 | 0.006206 | 0.051478 |
|      | koffPP1N       | 0.032621 | -0.0027  | -0.02612 | -0.00331 | -0.01289 | -0.01076 | 0.050574 | -0.00854 |
|      | koffPP2N       | 0.004474 | 0.005292 | -0.0105  | -0.03426 | 0.03638  | -0.07059 | 0.016431 | -0.04911 |
|      | koffPP1C       | -0.00335 | 0.011387 | 0.011329 | -0.01587 | 0.01551  | 0.024097 | -0.04756 | 0.084171 |
|      | koffPP2C       | 0.002039 | 0.02187  | -0.03775 | -0.04383 | 0.063906 | 0.010692 | 0.012056 | -8.6E-05 |

|              |          |          |          |          |          |          |          |          |
|--------------|----------|----------|----------|----------|----------|----------|----------|----------|
| koffPP1N     | 0.032621 | -0.0027  | -0.02612 | -0.00331 | -0.01289 | -0.01076 | 0.050574 | -0.00854 |
| koffPP2N     | 0.004474 | 0.005292 | -0.0105  | -0.03426 | 0.03638  | -0.07059 | 0.016431 | -0.04911 |
| koffPP1C     | -0.00335 | 0.011387 | 0.011329 | -0.01587 | 0.01551  | 0.024097 | -0.04756 | 0.084171 |
| koffPP2C     | 0.002039 | 0.02187  | -0.03775 | -0.04383 | 0.063906 | 0.010692 | 0.012056 | -8.6E-05 |
| konPPCaM0    | -0.07652 | -0.02603 | 0.056024 | -0.00952 | 0.004431 | -0.04217 | 0.001859 | -0.03531 |
| konPPCaM2N   | -0.0011  | -0.03159 | 0.021221 | -0.07922 | -0.02736 | -0.04943 | 0.046939 | -0.07864 |
| konPPCaM2C   | 0.024603 | 0.051998 | -0.0112  | 0.001628 | -0.07819 | -0.05401 | 0.055979 | -0.00023 |
| konPPCaM4    | -0.01666 | 0.074802 | 0.04998  | 0.964909 | -0.09008 | -0.04366 | -0.04532 | -0.02219 |
| koffPPCaM0   | 0.011787 | 0.022625 | 0.01468  | 0.025101 | -0.03326 | 0.016913 | 0.041721 | 0.042518 |
| koffPPCaM2N  | -0.02901 | -0.02228 | 0.014898 | -0.0129  | -0.04448 | -0.01629 | -0.02853 | -0.02723 |
| koffPPCaM2C  | 0.03751  | 0.052076 | -0.00023 | 0.002939 | -0.02108 | -0.01268 | -0.04125 | -0.0179  |
| koffPPCaM4   | 0.029548 | 0.010649 | 0.01263  | 0.006861 | 0.029588 | 0.033326 | -0.01485 | 0.006562 |
| konK1N       | -0.02493 | -0.08429 | -0.05854 | -0.12038 | 0.169795 | -0.00738 | -0.09324 | 0.051854 |
| konK2N       | -0.01449 | -0.03275 | -0.16445 | 0.008262 | 0.172842 | -0.00444 | -0.09519 | 0.038366 |
| konK1C       | -0.01202 | -0.02407 | 0.0077   | 0.015507 | 0.055329 | 0.006938 | -0.02982 | 0.022303 |
| konK2C       | -0.01279 | 0.006783 | -0.01526 | -0.01725 | 0.023068 | -0.00168 | -0.00644 | 0.011751 |
| koffK1N      | -7.6E-05 | 0.081729 | 0.149567 | 0.002396 | -0.1777  | 0.075027 | 0.072135 | 0.063598 |
| koffK2N      | 0.041616 | 0.076174 | 0.702958 | -0.03742 | -0.75812 | -0.00257 | 0.472605 | 0.008362 |
| koffK1C      | -0.03231 | 0.071424 | -0.06794 | 0.016722 | -0.02006 | -0.02873 | -0.01416 | -0.01026 |
| koffK2C      | -0.03579 | 0.008244 | -0.14512 | 0.035619 | -0.01386 | 0.005354 | 0.162134 | 0.014272 |
| konKCaM0     | 0.02097  | -0.04129 | -0.04333 | -0.03792 | 0.030661 | 0.023012 | -0.0314  | 0.015951 |
| konKCaM2N    | -0.0124  | -0.01282 | -0.03736 | -0.04328 | -0.01754 | -0.01861 | 0.011073 | -0.02081 |
| konKCaM2C    | -0.13072 | -0.11871 | -0.36279 | -0.07063 | 0.492016 | -0.10805 | -0.16618 | -0.03155 |
| konKCaM4     | -0.89641 | -0.74734 | 0.10305  | -0.81229 | 0.733015 | -0.8983  | 0.09903  | -0.56815 |
| koffKCaM0    | 0.057864 | 0.04953  | 0.03121  | 0.022951 | -0.06032 | 0.053477 | 0.087532 | -0.01798 |
| koffKCaM2N   | -0.0249  | 0.026606 | -0.01556 | -0.04722 | 0.02285  | -0.01055 | 0.033208 | 0.029366 |
| koffKCaM2C   | 0.343385 | 0.186874 | 0.729379 | 0.166328 | -0.81872 | 0.236652 | 0.413691 | 0.114319 |
| koffKCaM4    | 0.246342 | 0.133446 | 0.025964 | 0.18085  | -0.14087 | 0.19928  | 0.021306 | 0.089926 |
| konMK1N      | 0.006014 | -0.00728 | 0.016089 | -0.0461  | -0.00114 | -0.01577 | 0.004227 | -0.01471 |
| konMK2N      | 0.014599 | -0.07361 | -0.01732 | 0.019919 | 0.014762 | -0.01657 | -0.02542 | 0.019787 |
| konMK1C      | -0.00723 | -0.00607 | -0.004   | -0.03934 | 0.02197  | -0.00828 | -0.04981 | -0.00572 |
| konMK2C      | -0.01968 | 0.000424 | 0.026162 | 0.047859 | 0.059273 | 0.028692 | -0.01357 | 0.041372 |
| koffMK1N     | 0.040837 | 0.009976 | 0.02208  | -0.02181 | -0.02408 | 0.015292 | 0.025373 | -0.02776 |
| koffMK2N     | -0.00975 | 0.025674 | 0.004867 | 0.028779 | 0.054486 | 0.078207 | -0.01355 | 0.008727 |
| koffMK1C     | 0.046586 | 0.048413 | -0.03079 | 0.023255 | -0.05487 | -0.00813 | 0.061144 | 0.001234 |
| koffMK2C     | -0.0587  | -0.08723 | 0.031107 | -0.04075 | 0.064964 | -0.02121 | -0.04516 | 0.038277 |
| konMKCaM0    | 0.039173 | -0.01089 | -0.04849 | -0.03706 | -0.05459 | 0.263214 | -0.02043 | 0.021496 |
| konMKCaM2N   | 0.000921 | -0.02448 | -0.01381 | 0.041332 | 0.020259 | 0.0841   | -0.05624 | 0.002111 |
| konMKCaM2C   | 0.034599 | -0.02598 | 0.012271 | -0.0392  | -0.01213 | 0.10332  | 0.008962 | -0.04406 |
| konMKCaM4    | -0.23283 | -0.11453 | -0.20061 | -0.10247 | -0.20244 | 0.93756  | -0.04148 | -0.05591 |
| koffMKCaM0   | -0.05342 | -0.04261 | 0.024023 | -0.05307 | 0.022094 | -0.29099 | 0.003676 | 0.013431 |
| koffMKCaM2N  | 0.017292 | 0.058707 | -0.01751 | 0.053138 | 0.031668 | -0.04069 | -0.00855 | 0.053246 |
| koffMKCaM2C  | -0.03693 | -0.00473 | -0.00773 | 0.010559 | -0.03986 | -0.02485 | -0.03362 | -0.0216  |
| koffMKCaM4   | 0.004792 | 0.040456 | 0.057444 | 0.041047 | 0.010537 | -0.38765 | 0.028722 | 0.054498 |
| konNg1N      | 0.047649 | 0.217789 | -0.09627 | 0.081189 | 0.076052 | 0.140401 | -0.04753 | 0.032874 |
| konNg2N      | 0.07526  | 0.200898 | -0.07809 | 0.084499 | -0.01122 | 0.112309 | -0.03077 | -0.01438 |
| konNg1C      | 0.345947 | -0.1145  | 0.191296 | 0.253395 | 0.460173 | 0.420186 | -0.66411 | 0.225161 |
| konNg2C      | 0.370302 | -0.12197 | 0.29923  | 0.301359 | 0.387743 | 0.402083 | -0.66448 | 0.162255 |
| koffNg1N     | -0.10194 | -0.21182 | 0.171408 | -0.06378 | -0.0365  | -0.09775 | 0.052489 | 0.00464  |
| koffNg2N     | -0.11303 | -0.24554 | 0.107896 | -0.03803 | -0.01243 | -0.12557 | 0.026271 | -0.00498 |
| koffNg1C     | -0.37953 | 0.137229 | -0.17109 | -0.28126 | -0.41229 | -0.3965  | 0.644365 | -0.12118 |
| koffNg2C     | -0.30304 | 0.15822  | -0.38206 | -0.24785 | -0.36344 | -0.25699 | 0.635805 | -0.08624 |
| konNgCaM0    | -0.19891 | -0.33681 | -0.28894 | -0.07875 | -0.17277 | -0.34843 | 0.50209  | -0.32786 |
| konNgCaM2N   | -0.17275 | -0.50649 | 0.034355 | -0.12623 | -0.13049 | -0.20754 | 0.259829 | -0.09958 |
| konNgCaM2C   | -0.01867 | 0.200128 | -0.58155 | 0.095181 | -0.14375 | 0.060959 | 0.530153 | 0.087915 |
| konNgCaM4    | -0.09851 | -0.02489 | -0.04394 | -0.08211 | -0.06386 | -0.06916 | 0.070109 | -0.07642 |
| koffNgCaM0   | 0.295726 | 0.382399 | 0.363579 | 0.134383 | 0.292795 | 0.430192 | -0.67112 | 0.36234  |
| koffNgCaM2N  | 0.156774 | 0.361352 | -0.08026 | 0.088706 | 0.171589 | 0.148485 | -0.23818 | -0.00317 |
| koffNgCaM2C  | 0.224768 | -0.08436 | 0.377685 | 0.14005  | 0.274118 | 0.242065 | -0.60932 | 0.093399 |
| koffNgCaM4   | 0.213178 | 0.050318 | 0.036832 | 0.217835 | 0.224886 | 0.249856 | -0.32076 | 0.018888 |
| konNOS1N     | -0.03251 | -0.05816 | 0.010101 | 0.004925 | 0.025371 | -0.04326 | 0.061237 | -0.35839 |
| konNOS2N     | 0.019734 | -0.01769 | -0.00473 | -0.01175 | -0.05131 | 0.016631 | -0.00879 | -0.36344 |
| konNOS1C     | 0.063143 | 0.037564 | -0.00538 | 0.032673 | -0.02798 | 0.056511 | 0.017219 | -0.14346 |
| konNOS2C     | 0.002681 | -0.02073 | 0.016273 | 0.047621 | 0.036747 | 0.011016 | 0.022743 | -0.08479 |
| koffNOS1N    | 0.060538 | 0.008222 | 0.052152 | 0.057716 | 0.006634 | 0.023059 | 0.010732 | 0.317381 |
| koffNOS2N    | -0.06321 | 0.019518 | -0.00973 | -0.02379 | -0.0246  | -0.00248 | 0.009302 | 0.390239 |
| koffNOS1C    | 0.069779 | 0.033547 | -0.02712 | -0.0319  | -0.02779 | -0.03134 | 0.044669 | 0.075015 |
| koffNOS2C    | -0.03818 | 0.061098 | 0.007763 | 0.041416 | -0.02238 | 0.005611 | -0.00083 | 0.053778 |
| konNOSCaM0   | 0.010969 | 0.005491 | 0.039573 | -0.02399 | 0.034914 | 0.036248 | -0.05416 | 0.371913 |
| konNOSCaM2N  | -0.03035 | -0.04935 | -0.02155 | -0.00071 | -0.04224 | 0.020875 | 0.025942 | -0.04614 |
| konNOSCaM2C  | 0.054362 | -0.04467 | 0.079354 | 0.007519 | -0.05001 | 0.027847 | 0.006835 | 0.090478 |
| konNOSCaM4   | -0.06963 | -0.04128 | -0.02228 | -0.06843 | 0.014857 | -0.05768 | 0.011025 | 0.896384 |
| koffNOSCaM0  | -0.01592 | 0.077323 | -0.04647 | 0.037956 | 0.046247 | 0.007421 | -0.00684 | -0.36231 |
| koffNOSCaM2N | -0.04791 | -0.03998 | -0.04996 | 0.031037 | 0.035418 | -0.06014 | 0.010255 | -0.05545 |
| koffNOSCaM2C | 0.015025 | 0.035334 | 0.043407 | -0.02206 | -0.00756 | 0.003805 | 0.027613 | -0.0328  |
| koffNOSCaM4  | 0.004647 | 0.024864 | -0.00934 | 0.033797 | 0.014488 | -0.0051  | -0.01648 | -0.69583 |

| 100Hz |             | C_AC1    | C_AC8-Ct | C_AC8-Nt | C_CaN    | C_CaMKII | C_MLCK   | C_Ng     | C_NOS    |
|-------|-------------|----------|----------|----------|----------|----------|----------|----------|----------|
|       | kon1N       | 0.261129 | 0.329881 | -0.73569 | 0.194185 | 0.337441 | 0.336218 | -0.12389 | 0.043178 |
|       | koff1N      | 0.037696 | 0.033897 | 0.007272 | 0.001485 | -0.04269 | 0.006729 | -0.00029 | -0.02132 |
|       | kon2N       | 0.199058 | -0.39511 | 0.162926 | 0.134012 | 0.34778  | 0.161478 | -0.44507 | 0.036031 |
|       | koff2N      | -0.05436 | 0.015333 | -0.00856 | -0.03145 | -0.017   | -0.01822 | 0.045868 | -0.03928 |
|       | kon1C       | 0.018934 | -0.02771 | 0.043543 | -0.00339 | -0.03122 | 0.015434 | 0.013112 | -0.00162 |
|       | koff1C      | -0.04234 | 0.008806 | 0.01197  | 0.046789 | -0.02578 | -0.05924 | 0.022526 | 0.03538  |
|       | kon2C       | -0.03571 | 0.087779 | 0.049981 | 0.038551 | -0.00662 | -0.0085  | 0.026505 | -0.0155  |
|       | koff2C      | 0.024453 | 0.045036 | -0.03175 | -0.01634 | -0.00057 | -0.03792 | -0.0128  | 0.005828 |
|       | konAC11N    | -0.04326 | 0.02663  | 0.04538  | -0.01921 | -0.04795 | -0.05736 | 0.030674 | -0.02892 |
|       | konAC12N    | 0.003678 | 0.035379 | 0.010445 | -0.06607 | -0.04852 | 0.011019 | 0.017074 | -0.03331 |
|       | konAC11C    | 0.019889 | 0.072027 | 0.051872 | 0.022039 | -0.06469 | 0.020366 | -0.00212 | 0.043866 |
|       | konAC12C    | -0.05362 | 0.016905 | -0.02473 | -0.00874 | 0.041506 | -0.03285 | 0.006844 | 0.021487 |
|       | koffAC11N   | 0.003824 | -0.02822 | -0.0288  | -0.00381 | -0.02443 | 0.005797 | -0.00965 | 0.009467 |
|       | koffAC12N   | -0.05471 | -0.02281 | 0.004082 | -0.02404 | 0.062303 | -0.01832 | -0.02995 | 0.024786 |
|       | koffAC11C   | -0.00834 | 0.013513 | -0.04485 | -0.04716 | 0.06194  | -0.0085  | -0.01534 | -0.01825 |
|       | koffAC12C   | -0.0177  | 0.034846 | -0.00125 | -0.01186 | 0.054443 | 0.007342 | -0.01073 | -0.00685 |
|       | konAC1Ca    | 0.088305 | -0.00145 | -0.00616 | -0.06035 | -0.06354 | -0.02205 | 0.008626 | -0.00298 |
|       | konAC1Ca    | 0.070092 | 0.022375 | -0.03675 | 0.054321 | -0.02856 | 0.060017 | 0.004285 | -0.07507 |
|       | konAC1Ca    | 0.051779 | 0.034312 | -0.04417 | 0.034491 | 0.053092 | -0.00255 | -0.04786 | -0.00731 |
|       | konAC1Ca    | 0.960128 | -0.15946 | -0.1963  | -0.18626 | -0.62742 | -0.32477 | -0.06451 | -0.10625 |
|       | koffAC1Ca   | -0.17816 | -0.03766 | 0.033384 | -0.02528 | -0.01307 | 0.051165 | -0.0006  | -0.021   |
|       | koffAC1Ca   | -0.01183 | -0.0063  | -0.02162 | -0.05951 | 0.062545 | -0.00364 | -0.04146 | -0.00175 |
|       | koffAC1Ca   | -0.0276  | -0.02694 | -0.01636 | -0.03538 | 0.007015 | -0.00599 | -0.02982 | -0.03598 |
|       | koffAC1Ca   | -0.2078  | -0.01625 | -0.03084 | 0.002338 | -0.00971 | 0.040968 | 0.058562 | -0.02979 |
|       | konAC8ct1   | -0.04583 | -0.07681 | -0.0177  | 0.001128 | 0.020743 | -0.04037 | -0.01171 | 0.02489  |
|       | konAC8ct2   | 0.012429 | -0.007   | -0.04065 | 0.007967 | 0.022762 | -0.02557 | 0.026674 | -0.04068 |
|       | konAC8ct3   | 0.015237 | -0.03735 | 0.034167 | 0.046794 | 0.011984 | -0.03804 | 0.03011  | 0.063986 |
|       | konAC8ct4   | 0.020854 | 0.063082 | 0.02727  | 0.037471 | -0.03293 | 0.001767 | -0.04386 | 0.031855 |
|       | koffAC8ct1  | 0.033368 | 0.006765 | -0.07446 | -0.01486 | 0.013787 | 0.030217 | -0.04859 | -0.11031 |
|       | koffAC8ct2  | 0.029258 | 0.032811 | -0.03615 | 0.043075 | 0.001856 | -0.03072 | -0.02879 | -0.02214 |
|       | koffAC8ct3  | 0.080766 | -0.02769 | -0.00446 | 0.028288 | 0.038473 | 0.008088 | -0.07054 | 0.019512 |
|       | koffAC8ct4  | 0.0294   | 0.020076 | 0.003561 | 0.027168 | 0.008474 | -0.02366 | -0.07831 | -0.01928 |
|       | konAC8ct5   | 0.015254 | 0.410203 | 0.009964 | -0.00983 | -0.10838 | -0.06787 | 0.008836 | -0.04995 |
|       | konAC8ct6   | -0.03204 | 0.505821 | -0.01556 | -0.0302  | -0.10135 | -0.03522 | 0.014292 | 0.002152 |
|       | konAC8ct7   | 0.012458 | -0.04245 | 0.009261 | -0.02087 | -0.0582  | 0.020836 | 0.030179 | 0.015431 |
|       | konAC8ct8   | -0.10761 | 0.864256 | -0.03144 | -0.14782 | -0.16263 | -0.11506 | -0.04676 | -0.03946 |
|       | koffAC8ct9  | 0.013319 | -0.47339 | 0.007467 | 0.053429 | 0.060489 | 0.012608 | 0.00106  | -0.01744 |
|       | koffAC8ct10 | -0.02501 | -0.03577 | 0.01368  | 0.067602 | -0.02677 | 0.034706 | 0.063059 | 0.079226 |
|       | koffAC8ct11 | 0.033929 | 0.042527 | 0.038481 | 0.020758 | 0.005203 | 0.001636 | -0.01582 | -0.00796 |
|       | koffAC8ct12 | -0.05711 | -0.16715 | 0.038784 | 0.028463 | 0.022348 | -0.01147 | -0.0106  | 0.005107 |
|       | konAC8nt1   | 0.021718 | -0.06481 | 0.001843 | -0.00013 | -0.00473 | 0.014155 | 0.001149 | -0.02631 |
|       | konAC8nt2   | 0.002344 | -0.03728 | -0.02699 | -0.00386 | -0.01721 | -0.00324 | 0.042096 | -0.03245 |
|       | konAC8nt3   | -0.04592 | 0.003185 | -0.01741 | -0.0208  | -0.01465 | 0.016615 | -0.03207 | -0.03043 |
|       | konAC8nt4   | 0.01868  | -0.0257  | -0.02544 | 0.0307   | 0.034386 | 0.083355 | -0.03923 | 0.046555 |
|       | koffAC8nt5  | 0.052377 | -0.02653 | 0.052137 | 0.015691 | -0.022   | -0.01854 | 0.018183 | 0.026807 |
|       | koffAC8nt6  | 0.027234 | -0.01451 | 0.037834 | -0.05271 | -0.04909 | -0.06109 | 0.047494 | 0.030455 |
|       | koffAC8nt7  | -0.03261 | 0.011069 | -0.01955 | -0.03133 | -0.00113 | 0.008041 | 0.063614 | -0.01758 |
|       | koffAC8nt8  | 0.019861 | -0.00026 | 0.051806 | 0.010539 | -0.05673 | -0.02509 | 0.053873 | -0.03656 |
|       | konAC8nt9   | -0.09089 | -0.05878 | 0.48868  | -0.07119 | -0.12543 | -0.04948 | -0.03797 | -0.02218 |
|       | konAC8nt10  | 0.006053 | 0.014913 | 0.029317 | -0.01344 | -0.02216 | -0.03396 | -0.01523 | 0.001417 |
|       | konAC8nt11  | -0.04817 | 0.013335 | 0.617608 | -0.03904 | -0.19926 | -0.03869 | 0.007059 | 0.024102 |
|       | konAC8nt12  | -0.11431 | -0.04629 | 0.655022 | -0.04355 | -0.19343 | -0.10175 | 0.000488 | -0.00538 |
|       | koffAC8nt13 | 0.074341 | 0.036689 | -0.55287 | 0.047351 | 0.132289 | 0.079464 | 0.115113 | 0.024839 |
|       | koffAC8nt14 | 0.046538 | -0.00481 | -0.00948 | -0.01228 | -0.02414 | 0.023648 | 0.036094 | -0.03557 |
|       | koffAC8nt15 | 0.066265 | -0.02003 | -0.0092  | 0.022777 | 0.018059 | -0.01956 | 0.019018 | -0.00124 |
|       | koffAC8nt16 | 0.019955 | 0.024982 | -0.0659  | 0.040237 | 0.001864 | 0.016191 | 0.00244  | 0.05495  |
|       | konPP1N     | 0.027163 | 0.002131 | -0.00245 | -0.04019 | -0.0146  | -0.00074 | 0.008457 | -0.06161 |
|       | konPP2N     | 0.029006 | 0.010867 | 0.00069  | 0.008638 | -0.0366  | 0.017198 | 0.045346 | 0.001726 |
|       | konPP1C     | 0.018342 | -0.03417 | 0.026203 | 0.008227 | -0.01855 | 0.018802 | 0.004207 | -0.04144 |
|       | konPP2C     | 0.077098 | 0.004612 | 0.030553 | 0.026994 | -0.05716 | 0.018915 | 0.021911 | 0.004124 |



|  |            |          |          |          |          |          |          |          |          |
|--|------------|----------|----------|----------|----------|----------|----------|----------|----------|
|  | konPPCaM   | 0.047614 | -0.01861 | 0.022578 | -0.04967 | -0.03168 | 0.01719  | 0.015966 | 0.006274 |
|  | konPPCaM   | -0.02742 | 0.011815 | -0.01858 | -0.03203 | -0.02436 | -0.04344 | 0.054373 | 0.012543 |
|  | konPPCaM   | 0.076613 | 0.014848 | 0.021937 | 0.069158 | 0.014274 | 0.048386 | -0.02337 | -0.07065 |
|  | konPPCaM   | -0.09682 | -0.01541 | -0.02021 | 0.969776 | -0.05852 | 0.004644 | -0.02329 | 0.009385 |
|  | koffPPCaM  | -0.03558 | 0.009595 | 0.055205 | 0.075392 | 0.006657 | 0.023349 | 0.002355 | 0.020902 |
|  | koffPPCaM  | 0.009441 | -0.05845 | 0.031725 | -0.00686 | -0.00114 | -0.01479 | -0.0025  | -0.05892 |
|  | koffPPCaM  | -0.02614 | 0.025474 | 0.044154 | -0.05172 | 0.043212 | 0.001912 | -0.03926 | 0.014211 |
|  | koffPPCaM  | 0.011795 | 0.007328 | 0.024373 | -0.05495 | -0.03104 | -0.01292 | -0.04744 | -0.01285 |
|  | konK1N     | 0.035987 | -0.00078 | 0.01269  | -0.01241 | 0.056199 | -0.01894 | -0.04858 | 0.050182 |
|  | konK2N     | 0.009036 | -0.04887 | 0.001557 | 0.020624 | 0.033946 | 0.016321 | 0.012091 | -0.04856 |
|  | konK1C     | -0.01933 | 0.016879 | 0.009737 | 0.029462 | 0.005127 | 0.014512 | -0.0385  | 0.001543 |
|  | konK2C     | 0.02243  | 0.066516 | -0.00718 | 0.032339 | -0.01466 | 0.026238 | 0.027046 | -0.03889 |
|  | koffK1N    | -0.06265 | -0.02905 | -0.01456 | -0.03651 | -0.03724 | -0.03446 | 0.047878 | 0.015007 |
|  | koffK2N    | -0.06275 | 0.014661 | 0.004341 | 0.044237 | -0.02196 | -0.01692 | 0.005433 | -0.00026 |
|  | koffK1C    | -0.0713  | -0.06173 | -0.05891 | -0.02725 | 0.017157 | -0.05918 | 0.007125 | -0.02233 |
|  | koffK2C    | -0.00022 | 0.011229 | 0.054391 | 0.021771 | -0.00943 | 0.063586 | -0.03933 | 0.002081 |
|  | konKCaM    | -0.04985 | 0.011691 | -0.02869 | -0.00119 | -0.04394 | 0.00986  | 0.039219 | 0.001111 |
|  | konKCaM    | 0.027619 | -0.01486 | 0.033247 | -0.06235 | -0.01521 | -0.01346 | -0.04083 | -0.02977 |
|  | konKCaM    | -0.08997 | -0.07556 | -0.03353 | 0.006048 | 0.108565 | -0.04515 | -0.05639 | 0.008489 |
|  | konKCaM    | -0.94408 | -0.81633 | -0.59752 | -0.85183 | 0.907054 | -0.93125 | -0.09472 | -0.52881 |
|  | koffKCaM   | 0.030907 | 0.039309 | 0.004389 | -0.00862 | 0.015506 | 0.007912 | -0.01125 | 0.005523 |
|  | koffKCaM   | 0.008085 | -0.01241 | 0.02972  | 0.067403 | 0.039857 | 0.025955 | -0.02289 | 0.010572 |
|  | koffKCaM   | 0.00777  | 0.006279 | -0.02738 | 0.008176 | -0.00779 | -0.01989 | 0.036784 | -0.03114 |
|  | koffKCaM   | 0.168376 | 0.074558 | 0.002238 | 0.051703 | -0.09954 | 0.163349 | -0.03154 | 0.063152 |
|  | konMK1N    | -0.03396 | -0.06458 | -0.00261 | -0.00111 | 0.042451 | 0.002373 | -0.01165 | 0.001183 |
|  | konMK2N    | -0.05746 | 0.022364 | -0.02164 | 0.025955 | 0.02801  | -0.00849 | -0.04619 | -2.4E-05 |
|  | konMK1C    | -0.06347 | 0.018633 | -0.06828 | 0.021698 | 0.05405  | -0.01316 | -0.01562 | -0.02323 |
|  | konMK2C    | 0.015295 | -0.03966 | 0.007397 | 0.000666 | -0.013   | -0.00621 | -0.02774 | -0.03837 |
|  | koffMK1N   | -0.01616 | -0.00994 | -0.04087 | -0.01181 | 0.07244  | -0.02247 | -0.02747 | -0.04192 |
|  | koffMK2N   | 0.003931 | -0.04132 | -0.0699  | -0.03274 | -0.0144  | -0.00313 | 0.02119  | 0.005936 |
|  | koffMK1C   | -0.04739 | 0.039868 | -0.0222  | -0.00257 | -0.03688 | 0.044226 | -0.02167 | 0.007793 |
|  | koffMK2C   | 0.000214 | -0.0161  | -0.00283 | -0.00448 | 0.020151 | -0.00733 | -0.05307 | -0.0413  |
|  | konMKCaM   | -0.0268  | 0.042202 | 0.015893 | -0.01361 | -0.04655 | 0.366082 | -0.06871 | 0.010413 |
|  | konMKCaM   | -0.04957 | -0.03066 | 0.015503 | 0.020196 | 0.040914 | -0.00167 | 0.038668 | -0.01419 |
|  | konMKCaM   | 0.005853 | 0.008014 | 0.01161  | 0.002373 | 0.047731 | 0.040086 | -0.02887 | 0.054742 |
|  | konMKCaM   | -0.24995 | -0.08236 | -0.03991 | -0.14474 | -0.45268 | 0.949018 | -0.00742 | -0.00358 |
|  | koffMKCaM  | -0.01028 | 0.013293 | 0.027351 | 0.005507 | 0.030017 | -0.3762  | 0.007834 | 0.010525 |
|  | koffMKCaM  | 0.037609 | -0.0571  | -0.0312  | -0.02906 | 0.020759 | -0.06352 | 0.016121 | 0.024198 |
|  | koffMKCaM  | -0.06959 | -0.05478 | 0.029622 | -0.03272 | -0.02375 | 0.01386  | 0.00285  | 0.024191 |
|  | koffMKCaM  | -0.00652 | -0.01549 | 0.000253 | -0.0116  | 0.027204 | -0.1093  | -0.0391  | 0.002682 |
|  | konNg1N    | 0.069411 | 0.201223 | -0.27195 | 0.046531 | 0.104689 | 0.056883 | -0.06326 | -0.00845 |
|  | konNg2N    | 0.135163 | 0.145656 | -0.28471 | 0.072611 | 0.048406 | 0.114158 | -0.06029 | -0.04315 |
|  | konNg1C    | 0.302242 | -0.10153 | 0.237237 | 0.210596 | 0.598975 | 0.273499 | -0.7834  | -0.02548 |
|  | konNg2C    | 0.339421 | -0.09528 | 0.260811 | 0.22476  | 0.577692 | 0.306325 | -0.76964 | -0.04334 |
|  | koffNg1N   | -0.09886 | -0.17578 | 0.294238 | 0.000861 | -0.05747 | -0.08617 | 0.044603 | -0.07065 |
|  | koffNg2N   | -0.08045 | -0.13719 | 0.300095 | -0.07796 | -0.03003 | -0.10435 | 0.001028 | 0.012703 |
|  | koffNg1C   | -0.32333 | 0.096612 | -0.24567 | -0.18474 | -0.573   | -0.30121 | 0.781943 | -0.02716 |
|  | koffNg2C   | -0.20265 | 0.10154  | -0.26835 | -0.08665 | -0.49473 | -0.23663 | 0.695071 | -0.0581  |
|  | konNgCaM   | -0.03374 | -0.39186 | -0.51989 | 0.054263 | 0.105971 | -0.31765 | 0.314532 | -0.33289 |
|  | konNgCaM   | -0.03844 | -0.24237 | 0.103389 | -0.01924 | -0.19603 | -0.08106 | 0.26915  | 0.01292  |
|  | konNgCaM   | -0.13812 | -0.01312 | -0.07858 | -0.06925 | -0.00531 | -0.00725 | 0.046109 | -0.00121 |
|  | konNgCaM   | -0.01538 | 0.019222 | 0.005606 | -0.09114 | -0.10779 | -0.07841 | 0.119906 | 0.034923 |
|  | koffNgCaM  | 0.146065 | 0.447671 | 0.546346 | 0.019125 | 0.136612 | 0.355095 | -0.55906 | 0.35737  |
|  | koffNgCaM  | 0.202537 | 0.385092 | -0.02159 | 0.077525 | 0.169383 | 0.167673 | -0.36969 | 0.042999 |
|  | koffNgCaM  | 0.160406 | -0.01354 | 0.378504 | 0.044072 | 0.44247  | 0.148059 | -0.68009 | 0.034361 |
|  | koffNgCaM  | 0.30244  | 0.056461 | -0.08568 | 0.189932 | 0.530223 | 0.283193 | -0.69178 | -0.02311 |
|  | konNOS1M   | -0.01714 | 0.026733 | 0.02723  | 0.007005 | 0.030999 | -0.0099  | 0.029906 | -0.26687 |
|  | konNOS2M   | 0.043685 | -0.01779 | 0.013891 | -0.03309 | 0.060798 | 0.024061 | -0.02535 | -0.26352 |
|  | konNOS1C   | 0.026746 | -0.03523 | -0.03095 | -0.02152 | 0.048818 | 0.038617 | -0.05402 | -0.22244 |
|  | konNOS2C   | -0.01124 | -0.04291 | 0.026796 | -0.01284 | 0.020541 | -0.03445 | -0.00723 | -0.0015  |
|  | koffNOS1M  | -0.06097 | -0.04104 | -0.03947 | -0.0105  | 0.032619 | -0.02444 | 0.020886 | 0.264352 |
|  | koffNOS2M  | 0.046475 | 0.028401 | 0.040077 | 0.009111 | -0.05617 | 0.056137 | -0.01701 | 0.284485 |
|  | koffNOS1C  | -0.02774 | -0.03031 | 0.036608 | 0.043924 | -0.03671 | -0.04923 | 0.03373  | -0.00014 |
|  | koffNOS2C  | 0.019461 | 0.034945 | -0.00448 | 0.022079 | -0.03079 | -0.02341 | 0.010883 | -0.06633 |
|  | konNOSCaM  | -0.02866 | -0.00852 | 0.001689 | 0.027285 | 0.025244 | 0.019695 | -0.01348 | 0.429411 |
|  | konNOSCaM  | -0.01059 | 0.014154 | 0.053346 | -0.05239 | -0.0192  | 0.054794 | -0.0475  | -0.02489 |
|  | konNOSCaM  | -0.02086 | -0.02908 | -0.01239 | -0.01767 | 0.026674 | 0.042591 | -0.02133 | 0.00208  |
|  | konNOSCaM  | -0.06977 | 0.005601 | 0.011559 | -0.02224 | -0.02438 | -0.00968 | 0.025749 | 0.84582  |
|  | koffNOSCaM | -0.02337 | 0.038657 | 0.044854 | 0.014239 | 0.062211 | -0.00584 | -0.0383  | -0.37773 |
|  | koffNOSCaM | -0.01436 | -0.01814 | 0.019705 | -0.02438 | -0.04742 | -0.00406 | 0.018851 | 0.022564 |
|  | koffNOSCaM | -0.02848 | -0.04805 | -0.0215  | -0.03752 | 0.026887 | 0.010099 | -0.00631 | -0.05962 |
|  | koffNOSCaM | -0.05811 | -0.05152 | -0.00099 | -0.04384 | -0.04385 | 0.019773 | 0.015241 | -0.82549 |
