# Supplementary material for: Competitive tuning: Competition's role in setting the frequency-dependence of Ca2+-dependent proteins
Source: PubMed Central journal article supplement (PMC5690689; doi:10.1371/journal.pcbi.1005820), 2017-11-06
Supplement: pcbi.1005820.s004.pdf [file pcbi.1005820.s004.pdf]

Equations for four-state model, generated by the Mathematica module XCellerator. See also our original code at the digital repository listed elsewhere in our paper.

$$\begin{aligned}
[Ca]'^[t] == & -2 * konAC1C * ((Ca[t]^2)) * AC1CaM[0, 0][t] - 2 * konAC1N * (Ca[t]^2) * AC1CaM[0, 0][t] + 2 * \\
& koffAC1C AC1CaM[0, 1][t] - 2 * konAC1N * (Ca[t]^2) * AC1CaM[0, 1][t] + 2 * koffAC1N AC1CaM[1, 0][t] - 2 * \\
& konAC1C * (Ca[t]^2) * AC1CaM[1, 0][t] + 2 * koffAC1C AC1CaM[1, 1][t] + 2 * koffAC1N * AC1CaM[1, 1][t] \\
& - 2 * konAC8ctC * (Ca[t]^2) * AC8ctCaM[0, 0][t] - 2 * konAC8ctN * (Ca[t]^2) * AC8ctCaM[0, 0][t] + 2 * \\
& koffAC8ctC * AC8ctCaM[0, 1][t] - 2 * konAC8ctN * (Ca[t]^2) * AC8ctCaM[0, 1][t] + 2 * koffAC8ctN * \\
& AC8ctCaM[1, 0][t] - 2 * konAC8ctC * (Ca[t]^2) * AC8ctCaM[1, 0][t] + 2 * koffAC8ctC * AC8ctCaM[1, 1][t] \\
& + 2 * koffAC8ctN * AC8ctCaM[1, 1][t] - 2 * konAC8ntC * (Ca[t]^2) * AC8ntCaM[0, 0][t] - 2 * konAC8ntN * \\
& (Ca[t]^2) * AC8ntCaM[0, 0][t] + 2 * koffAC8ntC * AC8ntCaM[0, 1][t] - 2 * konAC8ntN * (Ca[t]^2) * \\
& AC8ntCaM[0, 1][t] + 2 * koffAC8ntN * AC8ntCaM[1, 0][t] - 2 * konAC8ntC * (Ca[t]^2) * AC8ntCaM[1, 0][t] \\
& + 2 * koffAC8ntC * AC8ntCaM[1, 1][t] + 2 * koffAC8ntN * AC8ntCaM[1, 1][t] - 2 * konC * (Ca[t]^2) * \\
& CaM[0, 0][t] - 2 * konN * (Ca[t]^2) * CaM[0, 0][t] + 2 * koffC * CaM[0, 1][t] - 2 * konN * (Ca[t]^2) * \\
& CaM[0, 1][t] + 2 * koffN * CaM[1, 0][t] - 2 * konC * (Ca[t]^2) * CaM[1, 0][t] + 2 * koffC * CaM[1, 1][t] + 2 * \\
& koffN * CaM[1, 1][t] - 2 * konKC * (Ca[t]^2) * CaMKIICaM[0, 0][t] - 2 * konKN * (Ca[t]^2) * \\
& CaMKIICaM[0, 0][t] + 2 * koffKC * CaMKIICaM[0, 1][t] - 2 * konKN * (Ca[t]^2) * CaMKIICaM[0, 1][t] + 2 * \\
& koffKN * CaMKIICaM[1, 0][t] - 2 * konKC * (Ca[t]^2) * CaMKIICaM[1, 0][t] + 2 * koffKC * CaMKIICaM[1, \\
& 1][t] + 2 * koffKN * CaMKIICaM[1, 1][t] - 2 * konPPC * (Ca[t]^2) * CaNCaM[0, 0][t] - 2 * konPPN * \\
& (Ca[t]^2) * CaNCaM[0, 0][t] + 2 * koffPPC * CaNCaM[0, 1][t] - 2 * konPPN * (Ca[t]^2) * CaNCaM[0, 1][t] + \\
& 2 * koffPPN * CaNCaM[1, 0][t] - 2 * konPPC * (Ca[t]^2) * CaNCaM[1, 0][t] + 2 * koffPPC * CaNCaM[1, \\
& 1][t] + 2 * koffPPN * CaNCaM[1, 1][t] - 2 * konMKC * (Ca[t]^2) * MLCKCaM[0, 0][t] - 2 * konMKN * \\
& (Ca[t]^2) * MLCKCaM[0, 0][t] + 2 * koffMKC * MLCKCaM[0, 1][t] - 2 * konMKN * (Ca[t]^2) * MLCKCaM[0, \\
& 1][t] + 2 * koffMKN * MLCKCaM[1, 0][t] - 2 * konMKC * (Ca[t]^2) * MLCKCaM[1, 0][t] + 2 * koffMKC * \\
& MLCKCaM[1, 1][t] + 2 * koffMKN * MLCKCaM[1, 1][t] - 2 * konNgC * (Ca[t]^2) * NgCaM[0, 0][t] - 2 * \\
& konNgN * (Ca[t]^2) * NgCaM[0, 0][t] + 2 * koffNgC * NgCaM[0, 1][t] - 2 * konNgN * (Ca[t]^2) * NgCaM[0, \\
& 1][t] + 2 * koffNgN * NgCaM[1, 0][t] - 2 * konNgC * (Ca[t]^2) * NgCaM[1, 0][t] + 2 * koffNgC * NgCaM[1, \\
& 1][t] + 2 * koffNgN * NgCaM[1, 1][t] - 2 * konNOSC * (Ca[t]^2) * NOSCaM[0, 0][t] - 2 * konNOSN * \\
& (Ca[t]^2) * NOSCaM[0, 0][t] + 2 * koffNOSC * NOSCaM[0, 1][t] - 2 * konNOSN * (Ca[t]^2) * NOSCaM[0, \\
& 1][t] + 2 * koffNOSN * NOSCaM[1, 0][t] - 2 * konNOSC * (Ca[t]^2) * NOSCaM[1, 0][t] + 2 * koffNOSC * \\
& NOSCaM[1, 1][t] + 2 * koffNOSN NOSCaM[1, 1][t]
\end{aligned}$$

$$\begin{aligned}
[CaM[0, 0]]'^[t] == & koffAC1CaM0 * AC1CaM[0, 0][t] + koffAC8ctCaM0 * AC8ctCaM[0, 0][t] + \\
& offAC8ntCaM0 * AC8ntCaM[0, 0][t] - konAC1CaM0 * AC1[t] * CaM[0, 0][t] - konAC8ctCaM0 * AC8ct[t] * \\
& CaM[0, 0][t] - konAC8ntCaM0 * AC8nt[t] * CaM[0, 0][t] - konC * (Ca[t]^2) * CaM[0, 0][t] - konN * \\
& (Ca[t]^2) * CaM[0, 0][t] - konKCaM0 * CaMKII[t] * CaM[0, 0][t] - konPPCaM0 * CaN[t] * CaM[0, 0][t] - \\
& konMKCaM0 * MLCK[t] * CaM[0, 0][t] - konNgCaM0 * Ng[t] * CaM[0, 0][t] - konNOSCaM0 * NOS[t] \\
& * CaM[0, 0][t] + koffC * CaM[0, 1][t] + koffN * CaM[1, 0][t] + koffKCaM0 * CaMKIICaM[0, 0][t] + \\
& koffPPCaM0 * CaNCaM[0, 0][t] + koffMKCaM0 * MLCKCaM[0, 0][t] + koffNgCaM0 * NgCaM[0, 0][t] + \\
& koffNOSCaM0 * NOSCaM[0, 0][t]
\end{aligned}$$

$$\begin{aligned}
[CaM[0, 1]]'^[t] == & koffAC1CaM2C * AC1CaM[0, 1][t] + koffAC8ctCaM2C * AC8ctCaM[0, 1][t] + \\
& koffAC8ntCaM2C * AC8ntCaM[0, 1][t] + konC * (Ca[t]^2) * CaM[0, 0][t] - koffC * CaM[0, 1][t] -
\end{aligned}$$

$$\begin{aligned} & \text{konAC1CaM2C} * \text{AC1}[t] * \text{CaM}[0, 1][t] - \text{konAC8ctCaM2C} * \text{AC8ct}[t] * \text{CaM}[0, 1][t] - \text{konAC8ntCaM2C} * \\ & \text{AC8nt}[t] * \text{CaM}[0, 1][t] - \text{konN} * (\text{Ca}[t]^2) * \text{CaM}[0, 1][t] - \text{konKCaM2C} * \text{CaMKII}[t] * \text{CaM}[0, 1][t] - \\ & \text{konPPCaM2C} * \text{CaN}[t] * \text{CaM}[0, 1][t] - \text{konMKCaM2C} * \text{MLCK}[t] * \text{CaM}[0, 1][t] - \text{konNgCaM2C} * \text{Ng}[t] * \\ & \text{CaM}[0, 1][t] - \text{konNOSCaM2C} * \text{NOS}[t] * \text{CaM}[0, 1][t] + \text{koffN} * \text{CaM}[1, 1][t] + \text{koffKCaM2C} * \\ & \text{CaMKIICaM}[0, 1][t] + \text{koffPPCaM2C} * \text{CaNCaM}[0, 1][t] + \text{koffMKCaM2C} * \text{MLCKCaM}[0, 1][t] + \\ & \text{koffNgCaM2C} * \text{NgCaM}[0, 1][t] + \text{koffNOSCaM2C} * \text{NOSCaM}[0, 1][t] \end{aligned}$$

$$\begin{aligned} [\text{CaM}[1, 0]]'[t] &= \text{koffAC1CaM2N} * \text{AC1CaM}[1, 0][t] + \text{koffAC8ctCaM2N} * \text{AC8ctCaM}[1, 0][t] + \\ & \text{koffAC8ntCaM2N} * \text{AC8ntCaM}[1, 0][t] + \text{konN} * (\text{Ca}[t]^2) * \text{CaM}[0, 0][t] - \text{koffN} * \text{CaM}[1, 0][t] - \\ & \text{konAC1CaM2N} * \text{AC1}[t] * \text{CaM}[1, 0][t] - \text{konAC8ctCaM2N} * \text{AC8ct}[t] * \text{CaM}[1, 0][t] - \text{konAC8ntCaM2N} * \\ & \text{AC8nt}[t] * \text{CaM}[1, 0][t] - \text{konC} * (\text{Ca}[t]^2) * \text{CaM}[1, 0][t] - \text{konKCaM2N} * \text{CaMKII}[t] * \text{CaM}[1, 0][t] - \\ & \text{konPPCaM2N} * \text{CaN}[t] * \text{CaM}[1, 0][t] - \text{konMKCaM2N} * \text{MLCK}[t] * \text{CaM}[1, 0][t] - \text{konNgCaM2N} * \text{Ng}[t] * \\ & \text{CaM}[1, 0][t] - \text{konNOSCaM2N} * \text{NOS}[t] * \text{CaM}[1, 0][t] + \text{koffC} * \text{CaM}[1, 1][t] + \text{koffKCaM2N} * \\ & \text{CaMKIICaM}[1, 0][t] + \text{koffPPCaM2N} * \text{CaNCaM}[1, 0][t] + \text{koffMKCaM2N} * \text{MLCKCaM}[1, 0][t] + \\ & \text{koffNgCaM2N} * \text{NgCaM}[1, 0][t] + \text{koffNOSCaM2N} * \text{NOSCaM}[1, 0][t] \end{aligned}$$

$$\begin{aligned} [\text{CaM}[1, 1]]'[t] &= \text{koffAC1CaM4} * \text{AC1CaM}[1, 1][t] + \text{koffAC8ctCaM4} * \text{AC8ctCaM}[1, 1][t] + \\ & \text{koffAC8ntCaM4} * \text{AC8ntCaM}[1, 1][t] + \text{konN} * (\text{Ca}[t]^2) * \text{CaM}[0, 1][t] + \text{konC} * (\text{Ca}[t]^2) * \text{CaM}[1, 0][t] - \\ & \text{koffC} * \text{CaM}[1, 1][t] - \text{koffN} * \text{CaM}[1, 1][t] - \text{konAC1CaM4} * \text{AC1}[t] * \text{CaM}[1, 1][t] - \text{konAC8ctCaM4} * \\ & \text{AC8ct}[t] * \text{CaM}[1, 1][t] - \text{konAC8ntCaM4} * \text{AC8nt}[t] * \text{CaM}[1, 1][t] - \text{konKCaM4} * \text{CaMKII}[t] * \text{CaM}[1, 1][t] \\ & - \text{konPPCaM4} * \text{CaN}[t] * \text{CaM}[1, 1][t] - \text{konMKCaM4} * \text{MLCK}[t] * \text{CaM}[1, 1][t] - \text{konNgCaM4} * \text{Ng}[t] * \\ & \text{CaM}[1, 1][t] - \text{konNOSCaM4} * \text{NOS}[t] * \text{CaM}[1, 1][t] + \text{koffKCaM4} * \text{CaMKIICaM}[1, 1][t] + \text{koffPPCaM4} * \\ & \text{CaNCaM}[1, 1][t] + \text{koffMKCaM4} * \text{MLCKCaM}[1, 1][t] + \text{koffNgCaM4} * \text{NgCaM}[1, 1][t] + \text{koffNOSCaM4} * \\ & \text{NOSCaM}[1, 1][t] \end{aligned}$$

$$\begin{aligned} [\text{AC1}]'[t] &= \text{koffAC1CaM0} * \text{AC1CaM}[0, 0][t] + \text{koffAC1CaM2C} * \text{AC1CaM}[0, 1][t] + \text{koffAC1CaM2N} * \\ & \text{AC1CaM}[1, 0][t] + \text{koffAC1CaM4} * \text{AC1CaM}[1, 1][t] - \text{konAC1CaM0} * \text{AC1}[t] * \text{CaM}[0, 0][t] - \\ & \text{konAC1CaM2C} * \text{AC1}[t] * \text{CaM}[0, 1][t] - \text{konAC1CaM2N} * \text{AC1}[t] * \text{CaM}[1, 0][t] - \text{konAC1CaM4} * \text{AC1}[t] * \\ & \text{CaM}[1, 1][t] \end{aligned}$$

$$\begin{aligned} [\text{AC8ct}]'[t] &= \text{koffAC8ctCaM0} * \text{AC8ctCaM}[0, 0][t] + \text{koffAC8ctCaM2C} * \text{AC8ctCaM}[0, 1][t] + \\ & \text{koffAC8ctCaM2N} * \text{AC8ctCaM}[1, 0][t] + \text{koffAC8ctCaM4} * \text{AC8ctCaM}[1, 1][t] - \text{konAC8ctCaM0} * \text{AC8ct}[t] \\ & * \text{CaM}[0, 0][t] - \text{konAC8ctCaM2C} * \text{AC8ct}[t] * \text{CaM}[0, 1][t] - \text{konAC8ctCaM2N} * \text{AC8ct}[t] * \text{CaM}[1, 0][t] - \\ & \text{konAC8ctCaM4} * \text{AC8ct}[t] * \text{CaM}[1, 1][t] \end{aligned}$$

$$\begin{aligned} [\text{AC8nt}]'[t] &= \text{koffAC8ntCaM0} * \text{AC8ntCaM}[0, 0][t] + \text{koffAC8ntCaM2C} * \text{AC8ntCaM}[0, 1][t] + \\ & \text{koffAC8ntCaM2N} * \text{AC8ntCaM}[1, 0][t] + \text{koffAC8ntCaM4} * \text{AC8ntCaM}[1, 1][t] - \text{konAC8ntCaM0} * \\ & \text{AC8nt}[t] * \text{CaM}[0, 0][t] - \text{konAC8ntCaM2C} * \text{AC8nt}[t] * \text{CaM}[0, 1][t] - \text{konAC8ntCaM2N} * \text{AC8nt}[t] * \\ & \text{CaM}[1, 0][t] - \text{konAC8ntCaM4} * \text{AC8nt}[t] * \text{CaM}[1, 1][t] \end{aligned}$$

$$[\text{CaMKII}]'[t] == -\text{konKCaM0} * \text{CaMKII}[t] * \text{CaM}[0, 0][t] - \text{konKCaM2C} * \text{CaMKII}[t] * \text{CaM}[0, 1][t] - \text{konKCaM2N} * \text{CaMKII}[t] * \text{CaM}[1, 0][t] - \text{konKCaM4} * \text{CaMKII}[t] * \text{CaM}[1, 1][t] + \text{koffKCaM0} * \text{CaMKIICaM}[0, 0][t] + \text{koffKCaM2C} * \text{CaMKIICaM}[0, 1][t] + \text{koffKCaM2N} * \text{CaMKIICaM}[1, 0][t] + \text{koffKCaM4} * \text{CaMKIICaM}[1, 1][t]$$

$$[\text{CaN}]'[t] == -\text{konPPCaM0} * \text{CaN}[t] * \text{CaM}[0, 0][t] - \text{konPPCaM2C} * \text{CaN}[t] * \text{CaM}[0, 1][t] - \text{konPPCaM2N} * \text{CaN}[t] * \text{CaM}[1, 0][t] - \text{konPPCaM4} * \text{CaN}[t] * \text{CaM}[1, 1][t] + \text{koffPPCaM0} * \text{CaNCaM}[0, 0][t] + \text{koffPPCaM2C} * \text{CaNCaM}[0, 1][t] + \text{koffPPCaM2N} * \text{CaNCaM}[1, 0][t] + \text{koffPPCaM4} * \text{CaNCaM}[1, 1][t]$$

$$[\text{MLCK}]'[t] == -\text{konMKCaM0} * \text{MLCK}[t] * \text{CaM}[0, 0][t] - \text{konMKCaM2C} * \text{MLCK}[t] * \text{CaM}[0, 1][t] - \text{konMKCaM2N} * \text{MLCK}[t] * \text{CaM}[1, 0][t] - \text{konMKCaM4} * \text{MLCK}[t] * \text{CaM}[1, 1][t] + \text{koffMKCaM0} * \text{MLCKCaM}[0, 0][t] + \text{koffMKCaM2C} * \text{MLCKCaM}[0, 1][t] + \text{koffMKCaM2N} * \text{MLCKCaM}[1, 0][t] + \text{koffMKCaM4} * \text{MLCKCaM}[1, 1][t]$$

$$[\text{Ng}]'[t] == -\text{konNgCaM0} * \text{Ng}[t] * \text{CaM}[0, 0][t] - \text{konNgCaM2C} * \text{Ng}[t] * \text{CaM}[0, 1][t] - \text{konNgCaM2N} * \text{Ng}[t] * \text{CaM}[1, 0][t] - \text{konNgCaM4} * \text{Ng}[t] * \text{CaM}[1, 1][t] + \text{koffNgCaM0} * \text{NgCaM}[0, 0][t] + \text{koffNgCaM2C} * \text{NgCaM}[0, 1][t] + \text{koffNgCaM2N} * \text{NgCaM}[1, 0][t] + \text{koffNgCaM4} * \text{NgCaM}[1, 1][t]$$

$$[\text{NOS}]'[t] == -\text{konNOSCaM0} * \text{NOS}[t] * \text{CaM}[0, 0][t] - \text{konNOSCaM2C} * \text{NOS}[t] * \text{CaM}[0, 1][t] - \text{konNOSCaM2N} * \text{NOS}[t] * \text{CaM}[1, 0][t] - \text{konNOSCaM4} * \text{NOS}[t] * \text{CaM}[1, 1][t] + \text{koffNOSCaM0} * \text{NOSCaM}[0, 0][t] + \text{koffNOSCaM2C} * \text{NOSCaM}[0, 1][t] + \text{koffNOSCaM2N} * \text{NOSCaM}[1, 0][t] + \text{koffNOSCaM4} * \text{NOSCaM}[1, 1][t]$$

$$[\text{AC1CaM}[0, 0]]'[t] == -\text{koffAC1CaM0} * \text{AC1CaM}[0, 0][t] - \text{konAC1C} * (\text{Ca}[t]^2) * \text{AC1CaM}[0, 0][t] - \text{konAC1N} * (\text{Ca}[t]^2) * \text{AC1CaM}[0, 0][t] + \text{koffAC1C} * \text{AC1CaM}[0, 1][t] + \text{koffAC1N} * \text{AC1CaM}[1, 0][t] + \text{konAC1CaM0} * \text{AC1}[t] * \text{CaM}[0, 0][t]$$

$$[\text{AC1CaM}[0, 1]]'[t] == \text{konAC1C} * (\text{Ca}[t]^2) * \text{AC1CaM}[0, 0][t] - \text{koffAC1C} * \text{AC1CaM}[0, 1][t] - \text{koffAC1CaM2C} * \text{AC1CaM}[0, 1][t] - \text{konAC1N} * (\text{Ca}[t]^2) * \text{AC1CaM}[0, 1][t] + \text{koffAC1N} * \text{AC1CaM}[1, 1][t] + \text{konAC1CaM2C} * \text{AC1}[t] * \text{CaM}[0, 1][t]$$

$$[\text{AC1CaM}[1, 0]]'[t] == \text{konAC1NkoffMKCaM2C} * \text{MLCKCaM}[0, 1][t] + (\text{Ca}[t]^2) * \text{AC1CaM}[0, 0][t] - \text{koffAC1CaM2N} * \text{AC1CaM}[1, 0][t] - \text{koffAC1N} * \text{AC1CaM}[1, 0][t] - \text{konAC1C} * (\text{Ca}[t]^2) * \text{AC1CaM}[1, 0][t] + \text{koffAC1C} * \text{AC1CaM}[1, 1][t] + \text{konAC1CaM2N} * \text{AC1}[t] * \text{CaM}[1, 0][t]$$

$$[AC1CaM[1, 1]]'[t] == konAC1N * (Ca[t]^2) * AC1CaM[0, 1][t] + konAC1C * (Ca[t]^2) * AC1CaM[1, 0][t] - koffAC1C * AC1CaM[1, 1][t] - koffAC1CaM4 * AC1CaM[1, 1][t] - koffAC1N * AC1CaM[1, 1][t] + konAC1CaM4 * AC1[t] * CaM[1, 1][t]$$

$$[AC8ctCaM[0, 0]]'[t] == -koffAC8ctCaM0 * AC8ctCaM[0, 0][t] - konAC8ctC * (Ca[t]^2) * AC8ctCaM[0, 0][t] - konAC8ctN * (Ca[t]^2) * AC8ctCaM[0, 0][t] + koffAC8ctC * AC8ctCaM[0, 1][t] + koffAC8ctN * AC8ctCaM[1, 0][t] + konAC8ctCaM0 * AC8ct[t] * CaM[0, 0][t]$$

$$[AC8ctCaM[0, 1]]'[t] == konAC8ctC * (Ca[t]^2) * AC8ctCaM[0, 0][t] - koffAC8ctC * AC8ctCaM[0, 1][t] - koffAC8ctCaM2C * AC8ctCaM[0, 1][t] - konAC8ctN * (Ca[t]^2) * AC8ctCaM[0, 1][t] + koffAC8ctN * AC8ctCaM[1, 1][t] + konAC8ctCaM2C * AC8ct[t] * CaM[0, 1][t]$$

$$[AC8ctCaM[1, 0]]'[t] == konAC8ctN * (Ca[t]^2) * AC8ctCaM[0, 0][t] - koffAC8ctCaM2N * AC8ctCaM[1, 0][t] - koffAC8ctN * AC8ctCaM[1, 0][t] - konAC8ctC * (Ca[t]^2) * AC8ctCaM[1, 0][t] + koffAC8ctC * AC8ctCaM[1, 1][t] + konAC8ctCaM2N * AC8ct[t] * CaM[1, 0][t]$$

$$[AC8ctCaM[1, 1]]'[t] == konAC8ctN * (Ca[t]^2) * AC8ctCaM[0, 1][t] + konAC8ctC * (Ca[t]^2) * AC8ctCaM[1, 0][t] - koffAC8ctC * AC8ctCaM[1, 1][t] - koffAC8ctCaM4 * AC8ctCaM[1, 1][t] - koffAC8ctN * AC8ctCaM[1, 1][t] + konAC8ctCaM4 * AC8ct[t] * CaM[1, 1][t]$$

$$[AC8ntCaM[0, 0]]'[t] == -koffAC8ntCaM0 * AC8ntCaM[0, 0][t] - konAC8ntC * (Ca[t]^2) * AC8ntCaM[0, 0][t] - konAC8ntN * (Ca[t]^2) * AC8ntCaM[0, 0][t] + koffAC8ntC * AC8ntCaM[0, 1][t] + koffAC8ntN * AC8ntCaM[1, 0][t] + konAC8ntCaM0 * AC8nt[t] * CaM[0, 0][t]$$

$$[AC8ntCaM[0, 1]]'[t] == konAC8ntC * (Ca[t]^2) * AC8ntCaM[0, 0][t] - koffAC8ntC * AC8ntCaM[0, 1][t] - koffAC8ntCaM2C * AC8ntCaM[0, 1][t] - konAC8ntN * (Ca[t]^2) * AC8ntCaM[0, 1][t] + koffAC8ntN * AC8ntCaM[1, 1][t] + konAC8ntCaM2C * AC8nt[t] * CaM[0, 1][t]$$

$$[AC8ntCaM[1, 0]]'[t] == konAC8ntN * (Ca[t]^2) * AC8ntCaM[0, 0][t] - koffAC8ntCaM2N * AC8ntCaM[1, 0][t] - koffAC8ntN * AC8ntCaM[1, 0][t] - konAC8ntC * (Ca[t]^2) * AC8ntCaM[1, 0][t] + koffAC8ntC * AC8ntCaM[1, 1][t] + konAC8ntCaM2N * AC8nt[t] * CaM[1, 0][t]$$

$$[AC8ntCaM[1, 1]]'[t] == konAC8ntN * (Ca[t]^2) * AC8ntCaM[0, 1][t] + konAC8ntC * (Ca[t]^2) * AC8ntCaM[1, 0][t] - koffAC8ntC * AC8ntCaM[1, 1][t] - koffAC8ntCaM4 * AC8ntCaM[1, 1][t] - koffAC8ntN * AC8ntCaM[1, 1][t] + konAC8ntCaM4 * AC8nt[t] * CaM[1, 1][t]$$

$$[CaMKIICaM[0, 0]]'[t] == konKCaM0 * CaMKII[t] * CaM[0, 0][t] - koffKCaM0 * CaMKIICaM[0, 0][t] - konKC * (Ca[t]^2) * CaMKIICaM[0, 0][t] - konKN * (Ca[t]^2) * CaMKIICaM[0, 0][t] + koffKC * CaMKIICaM[0, 1][t] + koffKN * CaMKIICaM[1, 0][t]$$

$$[CaMKIICaM[0, 1]]'[t] == konKCaM2C * CaMKII[t] * CaM[0, 1][t] + konKC * (Ca[t]^2) * CaMKIICaM[0, 0][t] - koffKC * CaMKIICaM[0, 1][t] - koffKCaM2C * CaMKIICaM[0, 1][t] - konKN * (Ca[t]^2) * CaMKIICaM[0, 1][t] + koffKN * CaMKIICaM[1, 1][t]$$

$$[CaMKIICaM[1, 0]]'[t] == konKCaM2N * CaMKII[t] * CaM[1, 0][t] + konKN * (Ca[t]^2) * CaMKIICaM[0, 0][t] - koffKCaM2N * CaMKIICaM[1, 0][t] - koffKN * CaMKIICaM[1, 0][t] - konKC * (Ca[t]^2) * CaMKIICaM[1, 0][t] + koffKC * CaMKIICaM[1, 1][t]$$

$$[CaMKIICaM[1, 1]]'[t] == konKCaM4 * CaMKII[t] * CaM[1, 1][t] + konKN * (Ca[t]^2) * CaMKIICaM[0, 1][t] + konKC * (Ca[t]^2) * CaMKIICaM[1, 0][t] - koffKC * CaMKIICaM[1, 1][t] - koffKCaM4 * CaMKIICaM[1, 1][t] - koffKN * CaMKIICaM[1, 1][t]$$

$$[CaNCaM[0, 0]]'[t] == konPPCaM0 * CaN[t] * CaM[0, 0][t] - koffPPCaM0 * CaNCaM[0, 0][t] - konPPC * (Ca[t]^2) * CaNCaM[0, 0][t] - konPPN * (Ca[t]^2) * CaNCaM[0, 0][t] + koffPPC * CaNCaM[0, 1][t] + koffPPN * CaNCaM[1, 0][t]$$

$$[CaNCaM[0, 1]]'[t] == konPPCaM2C * CaN[t] * CaM[0, 1][t] + konPPC * (Ca[t]^2) * CaNCaM[0, 0][t] - koffPPC * CaNCaM[0, 1][t] - koffPPCaM2C * CaNCaM[0, 1][t] - konPPN * (Ca[t]^2) * CaNCaM[0, 1][t] + koffPPN * CaNCaM[1, 1][t]$$

$$[CaNCaM[1, 0]]'[t] == konPPCaM2N * CaN[t] * CaM[1, 0][t] + konPPN * (Ca[t]^2) * CaNCaM[0, 0][t] - koffPPCaM2N * CaNCaM[1, 0][t] - koffPPN * CaNCaM[1, 0][t] - konPPC * (Ca[t]^2) * CaNCaM[1, 0][t] + koffPPC * CaNCaM[1, 1][t]$$

$$[CaNCaM[1, 1]]'[t] == konPPCaM4 * CaN[t] * CaM[1, 1][t] + konPPN * (Ca[t]^2) * CaNCaM[0, 1][t] + konPPC * (Ca[t]^2) * CaNCaM[1, 0][t] - koffPPC * CaNCaM[1, 1][t] - koffPPCaM4 * CaNCaM[1, 1][t] - koffPPN * CaNCaM[1, 1][t]$$

$$[\text{MLCKCaM}[0, 0]]'[t] == \text{konMKCaM0} * \text{MLCK}[t] * \text{CaM}[0, 0][t] - \text{koffMKCaM0} * \text{MLCKCaM}[0, 0][t] - \text{konMKC} * (\text{Ca}[t]^2) * \text{MLCKCaM}[0, 0][t] - \text{konMKN} * (\text{Ca}[t]^2) * \text{MLCKCaM}[0, 0][t] + \text{koffMKC} * \text{MLCKCaM}[0, 1][t] + \text{koffMKN} * \text{MLCKCaM}[1, 0][t]$$

$$[\text{MLCKCaM}[0, 1]]'[t] == \text{konMKCaM2C} * \text{MLCK}[t] * \text{CaM}[0, 1][t] + \text{konMKC} * (\text{Ca}[t]^2) * \text{MLCKCaM}[0, 0][t] - \text{koffMKC} * \text{MLCKCaM}[0, 1][t] - \text{koffMKCaM2C} * \text{MLCKCaM}[0, 1][t] - \text{konMKN} * (\text{Ca}[t]^2) * \text{MLCKCaM}[0, 1][t] + \text{koffMKN} * \text{MLCKCaM}[1, 1][t]$$

$$[\text{MLCKCaM}[1, 0]]'[t] == \text{konMKCaM2N} * \text{MLCK}[t] * \text{CaM}[1, 0][t] + \text{konMKN} * (\text{Ca}[t]^2) * \text{MLCKCaM}[0, 0][t] - \text{koffMKCaM2N} * \text{MLCKCaM}[1, 0][t] - \text{koffMKN} * \text{MLCKCaM}[1, 0][t] - \text{konMKC} * (\text{Ca}[t]^2) * \text{MLCKCaM}[1, 0][t] + \text{koffMKC} * \text{MLCKCaM}[1, 1][t]$$

$$[\text{MLCKCaM}[1, 1]]'[t] == \text{konMKCaM4} * \text{MLCK}[t] * \text{CaM}[1, 1][t] + \text{konMKN} * (\text{Ca}[t]^2) * \text{MLCKCaM}[0, 1][t] + \text{konMKC} * (\text{Ca}[t]^2) * \text{MLCKCaM}[1, 0][t] - \text{koffMKC} * \text{MLCKCaM}[1, 1][t] - \text{koffMKCaM4} * \text{MLCKCaM}[1, 1][t] - \text{koffMKN} * \text{MLCKCaM}[1, 1][t]$$

$$[\text{NgCaM}[0, 0]]'[t] == \text{konNgCaM0} * \text{Ng}[t] * \text{CaM}[0, 0][t] - \text{koffNgCaM0} * \text{NgCaM}[0, 0][t] - \text{konNgC} * (\text{Ca}[t]^2) * \text{NgCaM}[0, 0][t] - \text{konNgN} * (\text{Ca}[t]^2) * \text{NgCaM}[0, 0][t] + \text{koffNgC} * \text{NgCaM}[0, 1][t] + \text{koffNgN} * \text{NgCaM}[1, 0][t]$$

$$[\text{NgCaM}[0, 1]]'[t] == \text{konNgCaM2C} * \text{Ng}[t] * \text{CaM}[0, 1][t] + \text{konNgC} * (\text{Ca}[t]^2) * \text{NgCaM}[0, 0][t] - \text{koffNgC} * \text{NgCaM}[0, 1][t] - \text{koffNgCaM2C} * \text{NgCaM}[0, 1][t] - \text{konNgN} * (\text{Ca}[t]^2) * \text{NgCaM}[0, 1][t] + \text{koffNgN} * \text{NgCaM}[1, 1][t]$$

$$[\text{NgCaM}[1, 0]]'[t] == \text{konNgCaM2N} * \text{Ng}[t] * \text{CaM}[1, 0][t] + \text{konNgN} * (\text{Ca}[t]^2) * \text{NgCaM}[0, 0][t] - \text{koffNgCaM2N} * \text{NgCaM}[1, 0][t] - \text{koffNgN} * \text{NgCaM}[1, 0][t] - \text{konNgC} * (\text{Ca}[t]^2) * \text{NgCaM}[1, 0][t] + \text{koffNgC} * \text{NgCaM}[1, 1][t]$$

$$[\text{NgCaM}[1, 1]]'[t] == \text{konNgCaM4} * \text{Ng}[t] * \text{CaM}[1, 1][t] + \text{konNgN} * (\text{Ca}[t]^2) * \text{NgCaM}[0, 1][t] + \text{konNgC} * (\text{Ca}[t]^2) * \text{NgCaM}[1, 0][t] - \text{koffNgC} * \text{NgCaM}[1, 1][t] - \text{koffNgCaM4} * \text{NgCaM}[1, 1][t] - \text{koffNgN} * \text{NgCaM}[1, 1][t]$$

$$\begin{aligned} [\text{NOSCaM}[0, 0]]'[t] &= \text{konNOSCaM0} * \text{NOS}[t] * \text{CaM}[0, 0][t] - \text{koffNOSCaM0} * \text{NOSCaM}[0, 0][t] - \\ &\text{koffNOSC} * (\text{Ca}[t]^2) * \text{NOSCaM}[0, 0][t] - \text{konNOSN} * (\text{Ca}[t]^2) * \text{NOSCaM}[0, 0][t] + \text{koffNOSC} * \\ &\text{NOSCaM}[0, 1][t] + \text{koffNOSN} * \text{NOSCaM}[1, 0][t] \end{aligned}$$

$$\begin{aligned} [\text{NOSCaM}[0, 1]]'[t] &= \text{konNOSCaM2C} * \text{NOS}[t] * \text{CaM}[0, 1][t] + \text{koffNOSC} * (\text{Ca}[t]^2) * \text{NOSCaM}[0, 0][t] - \\ &\text{koffNOSC} * \text{NOSCaM}[0, 1][t] - \text{koffNOSCaM2C} * \text{NOSCaM}[0, 1][t] - \text{konNOSN} * (\text{Ca}[t]^2) * \text{NOSCaM}[0, \\ &1][t] + \text{koffNOSN} * \text{NOSCaM}[1, 1][t] \end{aligned}$$

$$\begin{aligned} [\text{NOSCaM}[1, 0]]'[t] &= \text{konNOSCaM2N} * \text{NOS}[t] * \text{CaM}[1, 0][t] + \text{konNOSN} * (\text{Ca}[t]^2) * \text{NOSCaM}[0, 0][t] - \\ &\text{koffNOSCaM2N} * \text{NOSCaM}[1, 0][t] - \text{koffNOSN} * \text{NOSCaM}[1, 0][t] - \text{koffNOSC} * (\text{Ca}[t]^2) * \text{NOSCaM}[1, \\ &0][t] + \text{koffNOSC} * \text{NOSCaM}[1, 1][t] \end{aligned}$$

$$\begin{aligned} [\text{NOSCaM}[1, 1]]'[t] &= \text{konNOSCaM4} * \text{NOS}[t] * \text{CaM}[1, 1][t] + \text{konNOSN} * (\text{Ca}[t]^2) * \text{NOSCaM}[0, 1][t] + \\ &\text{koffNOSC} * (\text{Ca}[t]^2) * \text{NOSCaM}[1, 0][t] - \text{koffNOSC} * \text{NOSCaM}[1, 1][t] - \text{koffNOSCaM4} * \text{NOSCaM}[1, 1][t] \\ &- \text{koffNOSN} * \text{NOSCaM}[1, 1][t] \end{aligned}$$
